# Supplementary material
Source: publisher site journal article supplement (https://www.degruyterbrill.com/publication/isbn/9783110741780/downloadAsset/9783110741780_Beispiele.zip)
Supplement: Supplementary file 2 [file 9783110741780_Beispiele.zip]

---


$$\dot{\mu} = p_{\mu}$$

$$\dot{\nu} = p_{\nu}$$

$$\dot{p}_{\mu} = 2\epsilon\mu - \frac{1}{4}\mu\nu^4 - \frac{1}{2}\mu^3\nu^2$$

$$\dot{p}_{\nu} = 2\epsilon\nu - \frac{1}{4}\nu\mu^4 - \frac{1}{2}\nu^3\mu^2$$

$\epsilon$  ist die mit dem Magnetfeld skalierte Energie und hat negative Werte

*Published with MATLAB® R2015b*
