# Supplementary material
Source: publisher site journal article supplement (https://www.degruyterbrill.com/publication/isbn/9783110741780/downloadAsset/9783110741780_Beispiele.zip)
Supplement: Supplementary file 10 [file 9783110741780_Beispiele.zip]

# Index

!, 73, 86  
=, 86  
' , 86  
( ), 86  
,, 86  
.., 86  
.\, 81  
:, 86  
<, 82  
<=, 82  
==, 82  
>, 82  
>=, 82  
[], 86  
%, 86  
%%, 86  
%}, 86  
&, 82  
&&, 82  
||, 82  
|, 82  
\, 81, 221, 226, 227, 291  
..., 86  
{%, 86  
~=, 82  
~, 82, 209  
{}, 86  
^, 80, 305  
\*, 80  
+, 80  
,, 86  
-, 80  
.^, 80  
.\*, 80  
./, 81  
.mlappinstall, 40  
.mltbx, 41  
.mlx, 49  
.prj, 40, 42

., 25, 90, 97, 98  
@, 203, 546  
/, 81, 221, 227  
,, 86  
Abbildung  
    modal, 399  
Ableitung, 172  
abs, 305  
Accelerator, 442  
accumarray, 90, 92  
Achsen  
    Eigenschaften, 327  
acos, 303  
acosd, 303  
acosh, 304  
acot, 303  
acotd, 303  
acoth, 304  
acsc, 303  
acscd, 303  
acsch, 304  
ActivePositionProperty, 400  
ActiveX, 610, 611  
actxcontrol, 611, 613  
actxcontrollist, 611  
actxcontrolselect, 611  
actxGetRunningServer, 611  
actxserver, 611  
add, 481, 486  
Add-Ons, 33  
addcats, 536, 537  
addedge, 146, 149  
addevent, 181, 188  
addlistener, 545, 556, 557  
addmulti, 481, 486  
addnode, 146, 149  
addpath, 67  
addpoints, 413, 416

addpref, 456  
addprop, 524, 532  
addproperty, 611  
addsample, 181, 184  
addsampletocollection, 181, 191  
addstyle, 442  
addtodate, 561, 563  
addts, 181, 191  
addvars, 524, 531  
adjacenca, 154  
adjacency, 146  
Adjazenzmatrix, 154, 301, 302  
airy, 309  
Airy-Funktion, 309  
aliasing, 131  
AlignVertexCenters, 414  
ALim, 400  
alim, 346, 348  
ALimMode, 400  
all, 82  
allchild, 427, 429  
alpha, 346, 348  
AlphaData, 348, 420  
    image, 423  
AlphaDataMapping, 417  
    image, 423  
alphamap, 346, 348, 395  
alphanumericBoundary, 110, 121  
alphanumericsPattern, 110, 118  
alphaShape, 145  
alphashape, 144  
AmbientLightColor, 400  
AmbientStrength, 417  
amd, 294, 296  
ancestor, 427, 429

- and, 82, 558
- Anfangswertproblem, 264
- angle, 305
- animatedline, 413, 416
- annotation, 425
  - arrow, 425
  - doublearrow, 425
  - ellipse, 425
  - FitBoxToText, 425
  - HeadLength, 425
  - HeadStyle, 425
  - HeadWidth, 425
  - line, 425
  - rectangle, 425
  - textarrow, 425
  - textbox, 425
- Annotation Objekte, 425
- Anonyme Funktion, 17
- anonyme Funktionen
  - Breakpoints, 46
- ans, 86, 87
- any, 82
- App
  - Check Box, 464
  - Eingabevariable, 466
  - externe Figure, 464
  - inaktive Objekte, 465
  - Label, 464
  - Menu Bar, 463
  - slider, 460
  - Tab Group, 463
  - Tag, 464
- App Designer, **459**
  - öffnen, 33
  - app, 462
  - Callbacks, 460
  - Code View, 459
  - Design View, 459
  - event, 462
  - mlapp, 459
  - Startup Funktion, 461
- appdesigner, 459
- append, 110, 121, 181, 191
  - timeseries, 184
- Applikationen, 39
- Apps, 39
  - Installationsfile, 40
  - Installationspfad, 41
  - installieren, 41
- Arcus-Funktionen, 303
- area, 356, 364, 421
- Area Objekt, 421
- Area-Funktionen, 304
- arguments, 208, 209
  - mustBe..., 209
- ARPACK, 619
- array2table, 539, 543
- array2timetable, 539, 543
- arrayfun, 538, 539
- Arrayindex, 90
  - end, 90
  - lineare Indizierung, 91
  - logischer, 92
  - logisches Sieb, 92
  - Zeilen-Spalten, 90
- Arraymultiplikation, 10
- Arrays
  - logische, 91
  - maximale Größe, 70
- ascii(ftp), 496
- asec, 303
- asecd, 303
- asech, 304
- asFewOffPattern, 110, 120
- asin, 303
- asind, 303
- asinh, 304
- asManyOffPattern, 110, 120
- assert, 212, 213
- Assert-Klasse (testen), 575
- Assertable Class, 575
- assignin, 196
- Assumable Class, 575
- Assume-Klasse (testen), 575
- atan, 303
- atan2, 303
- atand, 303
- atanh, 304
- audiodevinfo, 505, 506
- audioinfo, 511, 512
- audioplayer, 505
- audioread, 511
- audiorecorder, 505
- audiowrite, 511, 512
- Ausdrücke, reguläre, 113
- Ausreiser, 163
- autumn, 344
- axes, 400
  - Position, 324
- axis, 323, 326
  - Eigenschaften, 327
- BackFaceLighting, 417
- Backslash-Operator, 227
- balance, 232, 233
- Balkendiagramme, 357, 367
- bandwidth, 256
- bar, 356, 357, 421
- Bar Series Objekt, 421
- bar3, 367
- bar3h, 367, 421
- barh, 356, 357, 421
- BarLayout, 421
- BarWidth, 422
- barycentricToCartesian, 141
- baryToCart, 139
- Base Space, 15, 205
- base workspace, 75
- base2dec, 517, 518
- BaseLine, 415
- Basemap, 400
- Basevalue, 415
- basic fitting, 128
- Basic Fitting Tool, 54
- beatincinv, 309
- beep, 68
- Begrenzungsmuster, 120
- BeingDeleted, 395
  - axes, 400
- Berichte erstellen
  - Abbildungen, 48
- Berichte erstellen, 47
  - Bildformate, 47
  - Code wiedergewinnen, 49
  - Dateiformate, 48
  - Programmcode, 48
  - snapnow, 48
- Bessel-Funktionen, 310
  - 1. Art, 310
  - 2. Art, 310
  - modifizierte, 310, 311
- besselh, 309, 310
- besseli, 309–311
- besselj, 309, 310
- besselk, 309–311
- bessely, 309, 310
- beta, 309, 312

- Betafunktion, *311, 312*
  - Logarithmus, *313*
  - unvollständig, *312*
- betainc, 309, 312
- betaincinv, 313
- betaln, 309, 313
- Betriebssystemkommandos, *73*
- between, 565, 568
- bfsearch, 146, 150
- big, 298, 300
- bigstab, 298, 300
- bigstabl, 298, 300
- Big Data, **481**
- Bilddateien, *382, 488*
- Bilder, *381*
- bin2dec, 517, 518
- binary(ftp), 496
- Binomialkoeffizient, *316*
- Binomialkoeffizienten, 255
- bitand, 84
- bitcmp, 84
- bitget, 84
- bitor, 84
- bitset, 84
- bitshift, 84
- bitxor, 84
- blanks, 110, 111
- BLAS, *619*
- blkdiag, 90, 95
- bone, 344
- BorderType, *439*
- BorderWidth, *439*
- boundary pattern, *120*
- bounds, 158, 159
- Box, *401*
- box, 323, 327
- Boxstyle, *401*
- break, 196
- Breakpoints, *46*
- brighten, 344, 346
- Brush, *55*
- brush, 413, 426
- bsxfun, 538, 540
- btndown, 454
- btngroup, 454
- btnpress, 454
- btnresize, 454
- btnstate, 454
- btnup, 454
- bubble chart, 413
- bubblechart, 416
- bubblechart3, 416
- bubblelegend, 413, 423, 425
  - BubbleSizeOrder, *425*
  - LimitLabels, *425*
  - Style, *425*
- builddocsearchdb, 42, 58
- builtin, 198
- burgersode, 270
- BusyAction, *396*
  - axes, *400*
- ButtonDownFcn, *396*
  - axes, *400*
- bvp4c, 276
- bvp5c, 276, 277
- bvpextend, 277
- bvpget, 276, 277
- bvpinit, 276, 277
- bvpset, 276, 277
- bvpxtend, 276
- caldays, 565, 566
- caldiff, 565, 568
- calendar, 563
- calendarDuration, 565, 566
- Callback, *435*
- calllib, 599
- calmonths, 565, 566
- calquarters, 565, 566
- calweeks, 565, 566
- calyears, 565, 566
- camdolly, 350, 351
- Camera Toolbar, 54
- CameraPosition, *400*
- CameraPositionMode, *400*
- CameraTarget, *400*
- CameraTargetMode, *400*
- cameratoolbar, 350, 351
- CameraUpVector, *400*
- CameraUpVectorMode, *400*
- CameraViewAngle, *400*
- CameraViewAngleMode, *400*
- camlight, 350, 353
- camlookat, 350, 351
- camorbit, 350
- campan, 350, 351
- campos, 350
- camproj, 350
- camroll, 350, 351
- camtarget, 350
- camup, 350
- camva, 350
- camzoom, 350, 351
- cart2pol, 318
- cart2sph, 318
- cartesianToBarycentric, 141
- cartToBary, 139
- case, 194
- caseInsensitivePattern, 110, 120
- caseSensitivePattern, 110, 120
- cast, 513, 516
- cat, 90, 94
- catch, 195, 215
- categorical, 26, 536
- categories, 536, 538
- Cauchy-Matrix, *246*
- caxis, 344, 345
- Cayley-Hamilton-Theorem, *127*
- cd, 72
- CData
  - image, *423*
  - patch, *417*
  - surface, *417*
  - uicontrol, *435*
- CDataMapping, *418*
  - image, *423*
- CDF-File, *499*
- cdf2rdf, 232, 233
- cdfepoch, 496, 499
- cdfinfo, 496, 499
- cdfib, 496, 499
- cdfread, 496, 499
- cdfwrite, 496, 499
- ceil, 307
- cell, 11, 23, 519
- cell2mat, 539, 543
- cell2struct, 539, 544
- cell2table, 539, 543
- celldisp, 519, 520
- CellEditCallback, *440*
- cellfun, 539, 540
- cellplot, 519, 520
- CellSelectionCallback, *441*

- cellstr, 110, 111
- cgs, 298
- char, 9, 110, 121, 604
- Character-Array, 109
- characterListPattern, 110, 119
- Charakter-Kodierung, 533
- charakteristisches Polynom, 127
- Chebyshev-Matrix, 246
- Chebyshev-Vandermonde-Matrix, 247
- Check Box, 437
- checkcode, 78
- Checked, 442
- Children, 396
  - axes, 402
- chol, 221, 224
- Choleski-Zerlegung, 224, 296
  - unvollständige, 224
- cholupdate, 224, 232
- circshift, 90, 94
- circumcenter, 143
- circumcenters, 139
- cla, 409
- clabel, 365
- class, 24, 606
- classdef, 545, 546
- classpath.txt, 602
- classUnderlying, 481, 486
- clc, 61
- clear, 60, 74
  - import, 602
- clearpoints, 413, 417
- clearvars, 61
- Clement-Matrix, 247
- clf, 393, 399
- ClickedCallback, 445
- CLim, 346, 402
- CLimMode, 346, 402
- clipboard, 454
- Clipping
  - figure, 395
  - uibbuttongroup, 439
- clipping
  - axes, 402
- clippingstyle
  - axes, 402
- clock, 561
- close, 393, 399
- closereq, 431
- CloseRequestFcn, 396
- cmpermute, 381, 384
- cmunique, 381, 383
- cn, 314
- Code Analyse, 45, 53
- Code Analyzer, 52
- Code Compatibility Report, 36
- colamd, 291, 294, 296, 297
- colon, 558
- Color, 396, 402
- colorbar, 339, 342, 423
  - Direction, 424
  - Label, 424
  - Limits, 424
  - LimitsMode, 424
  - TickDirection, 424
  - TickLabels, 424
  - TickLabelsMode, 424
  - Ticks, 425
  - TicksMode, 425
- colorcube, 344
- colordef, 344, 346
- Colormap, 396
  - axes, 402
- colormap, 344
- colormapeditor, 344, 345
- ColorOrder, 402
- Colorscale
  - axes, 402
- colperm, 294, 297
- colstyle, 323
- ColumnEditable, 441
- ColumnFormat, 441
- ColumnName, 441
- ColumnSortable, 441
- ColumnWidth, 441
- COM-Schnittstelle, 610
- comet, 356, 363
- comet3, 367, 368
- Command History, 35
- Command Window, 35
- commandhistory, 35
- commandwindow, 35
- Community, 34
- compan, 244, 245
- Comparison Tool, 37
- compass, 356, 360, 415
- complex, 305, 306
- compose, 110, 122
- computer, 70
  - arch, 498
- comserver, 615
- cond, 218, 221
- condeig, 233, 234
- condest, 221
- coneplot, 370, 380
- conj, 305, 306
- conncomp, 146, 152
- Container
  - grafischer, 439
- containers.Map, 559
- contains, 110
- containsrange, 524, 530
- Contents Report, 37
- ContextMenu
  - axes, 400
- contextmenuOpeningFcn, 443
- continue, 193, 194
- contour, 365, 421
- Contour Objekt, 421
- contour3, 365, 367, 421
- contourc, 365
- contourf, 365, 421
- ContourMatrix, 422
- contourslice, 370, 374
- contrast, 370, 381, 382
- conv, 127, 173, 174
- conv2, 173, 174
- convertCharsToStrings, 110, 111
- convertContainedStringsToChars, 110, 111
- convertStringsToChars, 110, 111
- convertTo, 565, 569
- convertvars, 524, 532
- convexHull, 139, 140
- convhull, 144
- convhulln, 144
- convn, 173–175
- cool, 344
- copper, 344
- copyfile, 71
- copygraphics, 337
- copyobj, 427, 429

- corrcoef, 171
- cos, 303
- cosd, 303
- cosh, 304
- cospi, 303
- cot, 303
- cotd, 303
- coth, 304
- count, 110
- countcats, 536, 537
- cov, 170
- Coverage Report, 37, 580
- cplxpair, 305, 306
- CPU-Zeit, 565
- cputime, 563, 565
- CreateFcn, 396
  - axes, 400
- cross, 309, 316
- csc, 303
- cscd, 303
- csch, 304
- ctranspose, 558
  - decomposition, 227
  - timeseries, 181, 184
- cumprod, 158, 169
- cumsum, 158, 169
- cumtrapz, 158, 169, 170
- curl, 370
- Current Folder, 36
- CurrentAxes, 396
- CurrentCharacter, 395
- CurrentObject, 396
- CurrentPoint
  - axes, 400
  - figure, 395
- Curvature, 417
- cylinder, 386, 389
  
- daspect, 339, 341
- Data
  - uitable, 441
- Data Cursor, 55
- Data Statistics Tool, 54
- DataAspectRatio, 402
- DataAspectRatioMode, 402
- datacursormode, 390
  - SnapToDataVertex, 390
- datastore, 481, 483
- dataTipInteraction, 404
  
- DataTipTemplate, 415
- date, 561
- Dateien vergleichen, 37
- Dateinamen erzeugen, 197
- Daten
  - gruppieren, 165
  - normalisieren, 217
  - standardisieren, 217
- Datenglättung, 370
- Datenklassen, 513, 516
- Datenmarker
  - Eigenschaften, 321
  - Farben, 321
  - Symbole, 321
- datenum, 561
- dateshift, 565, 568
- datestr, 561
- datetick, 563, 564
- datetime, 565, 567
  - plot, 569
- datevec, 561
- Datum, 561
- Datumsachsen, 564, 569
- day, 565
- days, 565, 566
- dbclean, 74
- dbcont, 75
- dbdown, 75
- dblquad, 261, 262
- dbmex, 76
- dbquit, 76
- dbstack, 76
- dbstatus, 76
- dbstep, 77
- dbstop, 74
- dbtype, 77
- dbup, 75
- DCOM-Schnittstelle, 611
- DDE-Interface, 610
- dde23, 264, 273
- ddeget, 264, 273, 275
- ddensd, 264
- ddesd, 264, 275
- ddeset, 264, 273, 275
- deal, 203, 539, 542
  - function handle, 542
- deblank, 110, 111
- deblankl, 123
- debug, 77
  
- Debuggen, 215
- Debugger, 46
  - grafisch, 46
- debugger, 73
- dec2base, 517, 518
- dec2bin, 517, 518
- dec2hex, 517
- decic, 264, 271
- decomposition, 221, 226
- deconv, 127, 173–175
- DefaultAxesLineStyleOrder
  - root, 404
- degree, 146, 154
- del2, 172
- delaunay, 139, 145
- Delaunay-Tessalation, 139
- Delaunay-Triangulation, 139
- delaunayn, 139, 144
- delaunayTriangulation, 140
  - ConnectivityList, 140
  - Constraints, 140
  - convexHull, 140
  - isInterior, 140
  - Points, 140
  - voronoiDiagram, 140
- delaunayTriangulation, 141
- delete, 71, 427, 429
  - COM, 613
  - timer, 571
- DeleteFcn, 396
  - axes, 400
- deleteproperty, 611
- delevent, 181, 189
- DelimitedtextImportOptions, 467, 469
- delsample, 181, 184
- delsamplefromcollection, 181, 191
- demo, 57
- Dependency Report, 37
- Desktop, 32
  - Layout anpassen, 34
- det, 216, 218
- detectImportOptions, 467, 469
- Determinante, 218
- detrend, 173, 175
  - timeseries, 181, 185
- deval, 266, 280, 281

- dfsearch, 146, 150
- diag, 90, 96
- dialog, 448, 452
- diary, 69
- diff, 172, 565, 568
- Differentialgleichungen
  - gewöhnliche, 264
  - partielle, 283
- Differenz, 172
- diffuse, 346, 347
- DiffuseStrength, 418
- Digammafunktion, 312
- digitBoundary, 110, 121
- digitsPattern, 110, 118, 119
- digraph, 146, 148
- diophantische Gleichungen, 317
- dir, 72
- discretize, 158, 165
- disp, 24, 212, 476, 506
- display, 212, 506
- DisplayFormatOption, 70
- DisplayName, 416
- dissect, 294, 297
- distances, 146, 154
- dither, 381, 384
- divergence, 370
- Divergenz, 370
- DLL-Files, 598
- DLL-Interface, 598
- dmperm, 294
- dn, 314
- doc, 39, 57
- DockControls, 395
- docsearch, 57
- Doppelfakultät, 169
- dos, 72
- dot, 309, 316
- double, 7, 110, 111, 513, 514, 604
- double-Zahlen, 89
- dragrect, 434, 446
- DrawMode, 400
- drawnow, 427, 429, 430
- dsearchn, 139
- duration, 565
- dynamicprops, 545, 548
- Echelon-Form, 219
- echo, 68
- echodemo, 57
- EdgeAlpha, 418
- edgeAttachments, 139, 143
- EdgeColor, 418
- EdgeLighting, 418
- edges, 139, 143
- edit, 44
- Editor, 44
- eig, 233, 234, 245
- Eigenvektor, 234
- Eigenwert, 234
- Eigenwertproblem, 234
  - verallgemeinertes, 234, 236
- eigs, 233, 234
- Einheitsmatrix, 97
- Einsmatrix, 97
- ellipj, 309, 313
- ellipke, 309
- Ellipsoid, 389
- ellipsoid, 386, 389
- elliptische Integrale, 313
- else, 193
- elseif, 193
- E-Mail versenden, 493
- Enable, 436
- enableservice, 615
- encoding, 533
- end, 90, 192, 558
- endsWith, 110
- endwith, 118
- engClose, 597
- engEvalString, 597
- engGetVariable, 597
- Engine-Routinen, 596
- engOpen, 597
- engOpenSingleUse, 597
- engOutputBuffer, 597
- engPutVariable, 597
- enumeration, 545, 554
  - methods, 554
- eomday, 563, 564
- eps, 86, 89
- eq, 82, 558
- equilibrate, 221, 222
- erf, 309, 314
- erfc, 309, 314
- erfcinv, 309, 314
- erfcx, 309, 314
- erfinv, 309, 314
- error, 212
- errorbar, 356, 363, 415
- errordlg, 448, 451
- etime, 563, 564
- etree, 301
- etreeplot, 301, 302
- eval, 197
- evalc, 197
- evalin, 198
- Eventfunktion, 18, 266
- Eventfunktionen, 275
- events, 555, 556, 611
- exceltime, 565, 569
- Execute(COM), 616
- exist, 206
- exit, 61
- exp, 304
- expint, 309, 314
- expm, 242
- expm1, 304
- Exponentialfunktion, 304
- export2wsdlg, 448, 449
- exportgraphics, 337
- exportsetupdlg, 448, 450
- Extent, 437
- extract, 110, 118, 122
- extractAfter, 110, 122
- extractBefore, 110, 122
- extractBetween, 122
- extractbetween, 110
- Extrapolation, 133
- eye, 10, 97
- ezpolar, 354
- FaceAlpha, 164, 348, 418
  - patch, 419
- FaceColor, 418
- FaceLighting, 418
- faceNormal, 143
- FaceNormals, 418
- faceNormals, 139
- FaceNormalsMode, 418
- Faces, 419
- FaceVertexAlphaData, 348, 419
- FaceVertexCData, 419
- factor, 317

- factorial, 316
- Factory-Werte, 393
- Faktorielle, 169
- Fakultät, 316
- false, 90, 91
- Faltung, 174
- Farbapproximation, 384
- Farbbalken, 342
  - gemeinsamer, 342
- Farbdithering, 384
- Farben, 381
- Farbmatrix, 383
  - wandeln, 383
- Fast-Fourier-Transformation, 176
- fatalAssert-Klasse (testen), 575
- fatalAssertable Class, 575
- fclose, 467, 469
- fcontour, 354, 355
  - Fill, 355
  - LevelList, 355
  - LevelStep, 355
- feather, 356, 360, 415
- featureEdges, 139, 143
- fehlende Werte, 162
- Fehlerbalken, 363, 415
- feof, 496, 497
- ferror, 496, 497
- feval, 198
- Feval(COM), 616
- fewerbins, 158, 165, 166
- FFT, 176
- fft, 175
- fft2, 175
- fftn, 175, 177
- fftshift, 175, 177
- FFTW, 618
- fftw, 179
- fgetl, 467, 475
- fgets, 467, 475
- fid, 468
- Fiedler-Matrix, 247
- fieldnames, 519, 522, 607
- Figure
  - öffnen, 33
  - Eigenschaften, 394
  - Generate Code, 54
  - Mauszeiger, 398
- figure, 393, 394
- Figure Palette, 53
- figurepalette, 454, 456
- File
  - suchen, 37
- File Comparison Tool, 37
- File Exchange, 34
- file identifier, 468
- fileattrib, 71
- filebrowser, 37
- FileDatastores, 483
- filemarker, 496, 497
- FileName, 395
- fileparts, 496, 497
- fileread, 467, 475
- filesep, 496, 497
- Fill, 422
- fill, 356, 364
- fill3, 339
- fillmissing, 158
- filloutliers, 158
- FillValue-Wert, 469
- Filter, **173**
- filter, 173
  - timeseries, 181, 185
- filter2, 173, 174
- fimplicit, 354, 355
- fimplicit3, 354, 355
- find, 9, 90, 96, 289
- Find Files, 37
- findall, 427, 428
  - uifigure, 394
- findedge, 146, 150
- findfigs, 427, 428
- findgroups, 539, 541
- findnode, 146, 150
- findobj, 427, 428
- findprinters, 336
- finish, 59
- finish.m, 67
- finishdlg, 59
- finishesav, 59
- FIR-Filter, 174
- FITS, 501
- fitsdisp, 496, 501
- fitsinfo, 496
- fitsread, 496
- fitswrite, 496, 501
- fix, 307
- FixedWidthImportOptions, 467, 470
- Flächenplot, 364
- flag, 344
- flintmax, 513, 514
- flip, 90, 94
- fliplr, 90, 94
- flipud, 90, 94
- floor, 307
- flow, 375
- fmesh, 354, 356
- fminbnd, 257, 259
- fminsearch, 257–259
- FontAngle, 402, 450
- FontName, 402, 450
- FontSize, 403, 450
- FontSizeMode, 403
- FontUnits, 403, 450
- FontWeight, 403, 450
- fopen, 467
- for, 192
  - effiziente Programmierung, 192
- format, 69
- format rat, 317
- Fourieranalyse, **175**
- fplot, 354
  - Function, 354
  - meshdensity, 354
  - ShowPoles, 354
  - TRange, 355
  - TRangeMode, 355
  - XFunction, 354
  - XRange, 355
  - XRangeMode, 355
  - YFunction, 354
  - ZFunction, 354
- fplot3, 354, 355
- fprintf, 24, 212, 282, 467, 475
- frame2im, 385, 386
- Frank-Matrix, 248
- fread, 467, 478
- freeBoundary, 139, 143
- freqspace, 97, 101
- frewind, 468, 496
- Frobenius-Norm, 217
- fscanf, 467, 475, 477
- fseek, 468, 496
- fsurf, 354, 356



- ftell, 496
- ftp, 495, 496
- FTP-Server, 495
- full, 288
- fullfile, 496, 497
- func2str, 203
- function, 18, **199**
  - functions, 15
  - handle, 203
  - nested, 25, 200
  - private, 202
  - shadowed, 66
- Function Browser, 35
- function handle, 17, 203
  - anonymous, 203
  - vektorwertig, 542
- Function Space, 15, 205
- FunctionLine, 355
- functions, 203
- functiontests, 575
- functiontests, 573, 575
- Funktionen, 15, 199
  - Abhängigkeiten, 66
  - Dauer messen, 564
  - lokale, 202
  - parametrisieren, 205
  - Übergabekonzept, 201
  - Variablenübergabe, 24
- Funktionsargumente, 208
  - testen, 208
- funm, 242
- fwrite, 467, 478
- fzero, 257, 259
  
- gallery, 244, 246
- gamma, 309, 311
- Gammafunktion, 311
  - Logarithmus, 312
  - unvollständig, 311
- gammainc, 309, 311
- gammaincinv, 309, 312
- gammaln, 309
- gather, 481, 486
- gca, 408, 429
- gcbf, 427, 429
- gcbo, 427, 429
- gcd, 317
- gcf, 393, 394, 429
- gcmr, 481, 488
  
- gco, 427, 429
- ge, 82, 558
- Gear-Matrix, 248
- Genauigkeit
  - double, 23
  - single, 23
- genpath, 67
- geoaxes, 390, 400
- geobasemap, 390
- geobubble, 390, 391
- geodensityplot, 390, 391
- geolimits, 390, 391
- geoplot, 390
- geoscat, 390, 391
- geotickformat, 390, 391
- Geschwindigkeitsplots, 415
- get, 427, 506, 603
  - COM, 611, 613
  - timeseries, 181, 182
  - tscollection, 181, 190
- getabstime, 181, 185
  - tscollection, 191
- getappdata, 427, 430
- getAxesPanMotion, 329
- getAxesZoomMotion, 329
- GetCharArray, 616
- getdatasamplesize, 181, 183
- getenv, 73
- getfield, 519, 522
- getframe, 385
- GetFullMatrix, 616
- getinterpmethod, 181, 187
- getnext, 481, 487
- getpoints, 413, 417
- getpref, 456, 457
- getqualitydesc, 181, 183
- getsample, 181, 184
- getsamplingsize, 181, 185
  - tscollection, 191
- gettimeseriesnames, 181, 191
- gettsafteratevent, 181, 189
- gettsafterevent, 181, 189
- gettsbeforeatevent, 181, 189
- gettsbeforeevent, 181, 189
- gettsbetweenevents, 181, 189
- GetVariable, 616
- getvaropts, 467, 469, 470
- GetWorkspaceData, 616
- ginput, 390
  
- Git, 37
- Givens-Rotation, ebene, 233
- Gleichungssystem
  - Lösbarkeit, 219
- global, 15, 205
- global space, 205
- gmres, 298, 300
- Gmres-Verfahren, 300
- Gnuzip, 498
- gplot, 301, 302
- grabcode, 49
- Gradient, 172
- gradient, 172
- Gradientenverfahren, konjugierte, 298
- grafische Objekte, 392
  - Voreinstellung, 393
- graph, 146
- Graphen, **146**
  - Ausgangsgrad, 154
  - Breitensuche, 150
  - Eingangsgrad, 154
  - Grad, 154
  - Kurzester Pfad, 153
  - Maximaler Fluss, 151
  - minimaler Schnitt, 152
  - minimaler Spannbaum, 152
  - Nachbar, 154
  - Nachfolger, 154
  - plot, 154
  - Tiefensuche, 150
  - Topologische Sortierung, 153
  - Transitive Hülle, 153
  - Vorgänger, 154
  - Zusammenhang, 152
- GraphicsSmoothing, 395
- Grauwerte, 382
- Grauwertebild, 383
- gray, 344, 370, 381, 382
- grid, 323, 328
- GridAlpha, 403
- GridAlphaMode, 403
- GridColor, 403
- GridColorMode, 403
- griddata, 128, 136
- griddatan, 128, 136, 137, 144
- griddedInterpolant, 128, 135

- GridLineStyle, *403*
- GridSize, *410*
- groot, 393
  - default, 393
  - factory, 393
- größter gemeinsamer Teiler, *317*
- groupsummary, 539, 542
- gsvd, 233, 239
- gt, 82, 558
- gtext, 323, 332
- guidata, 454, 455
- guihandles, 454, 455
- gunzip, 498
- gzip, 498
  
- h5create, 503
- h5disp, 503
- h5info, 503
- h5read, 503
- h5readatt, 503
- h5write, 504
- h5writeatt, 504
- hadamard, 244, 254
- Hadamard-Matrix, *254*
- Halten bei Fehler, *45*
- handle, 320, 392, 545
- HandleVisibility, *396*
  - axes, *400*
- hankel, 244, 254
- Hankel-Funktionen, *310, 311*
- Hankel-Matrix, *248, 252, 254*
- hasdata, 481, 484
- hasnext, 481, 487
- HDF, *502*
- hdf, 502
- hdf5, 504
- hdfan, 502
- hdfdf24, 502
- hdfdf8, 502
- hdfh, 502
- hdfhd, 502
- hdfhe, 502
- hdfinfo, 502
- hdfml, 502
- hdfpt, 503
- hdfread, 502
- hdfv, 503
- hdfvf, 503
- hdfvh, 503
- hdfvs, 503
- head, 481, 486, 524
- heatmap, 524, 534
- height, 524, 528
- help, 57, 497
- Help Browser, *38*
- Help Report, *37*
- helpdlg, 58, 448, 451
- Hermite-Transformationen, *317*
- hess, 233, 240
- Hessenberg-Matrix, *240*
- hex2dec, 517
- hex2num, 517
- hgexport, 431, 433
- hggroup, 431
- hgload, 431, 433
- hgsave, 431, 433
- hgtransform, 431
- hidden, 346
- highlight, 146
- hilb, 244, 254
- Hilbert-Matrix, *249, 254*
- histcounts, 158, 165
- histcounts2, 158, 167
- histogram, 158, 164
  - BinMethod, 165
  - categoricals, 164
  - DisplayStyle, 165
  - Normalization, 165
- histogram2, 158, 166
- Histogramme, *164*
  - zweidimensional, *166*
- HitTest
  - axes, *403*
- hms, 565, 569
- Hohenlinienplot, *365, 367*
- Höhenlinienplot, *365*
- hold, 319, 323, 327
- home, 61
- HorizontalAlignment
  - uicontrol, *437*
- horzcat, 558
  - tscollection, 181, 191
- hot, 344
- hour, 565, 569
- hours, 565, 566
- Householder-Matrix, *248*
- hsv, 344
- hsv2rgb, 381, 383
- Hülle, konvexe, *144*
- hyperbolische Funktionen, *304*
- hypot, 305, 540
- Hypothesentest, *171*
  
- i, 86
- ichol, 221, 224
- Icon
  - uifigures, *396*
- idealfilter, 181, 185
- idivide, 81
- if, 24, 193
- ifft, 175
- ifft2, 175
- ifftn, 175, 177
- ifftshift, 175, 177
- Illustration Objekte, *423*
- ilu, 221, 223
- im2frame, 385, 386
- im2java, 488, 490
- imag, 305, 306
- image, 370, 381, 413, 423
- Image-Objekt, *348*
- ImageDatastore, *483, 485*
- Imagedaten, *383*
  - indiziert, *383*
  - RGB, *383*
- imagesc, 370, 381, 382
- imageview, 448, 451
- Imaginärteil, *306*
- imapprox, 381, 384
- imfinfo, 488, 490
- imformats, 488, 490
- import, 602
- Import Data, *55*
  - Dezimalseparator, *56*
  - Spaltenseparator, *56*
- Import Wizard, *55*
- importdata, 467, 475
- imread, 488, 502
- imshow, 381, 382
- imwrite, 488, 489, 502
- incenter, 143
- inceneters, 139
- incidence, 146, 154
- ind2rgb, 381, 383

- ind2sub, 90
- indegree, 146, 154
- Index
  - ., 25
  - linearer, 9
  - logischer, 9
  - Zeilen,Spalten, 9
- Indexfarben, 381
- inf, 86, 87
- InferiorClasses, 547
- inmem, 64
- innerjoin, 524, 527
- InnerPosition
  - axes, 404
- Innerposition, 396
- inOutStatus, 139, 140
- inpolygon, 144
- input, 215, 467, 475
- inputdlg, 448, 452
- inputname, 208, 209
- inputParser, 208, 209
  - addOptional, 210
  - addParameter, 210
  - addRequired, 211
  - Eigenschaften, 211
  - Parameter, 211
- insert
  - Python, 608
- inspect, 607, 611
- int16, 513, 514
- int2str, 24, 123
- int32, 513, 514
- int64, 513, 514
- int8, 513, 514
- Integerdivision, 81
- IntegerHandle, 396
- integral, 261
- integral2, 261, 262
- integral3, 261, 262
- Integration, 260
  - eindimensionale, 261
  - parametrisierte Funktion, 262
  - Trapez, 169
- Interactions, 404
- interface, 613
- interfaces, 611
- Internetzugriff, 493
- interp1, 19, 128, 133
  - datetime, 565
  - duration, 565
- interp2, 19, 128, 133
- interp3, 19, 128, 133, 135
- interpft, 128, 131
- interpfn, 19, 128, 133, 135
- Interpolation, 19, **129**
  - Chebyshev, 129
  - dreidimensionale, 135
  - FFT, 131
  - Hermitsche, 129
  - image, 423
  - Lagrange, 129
  - multidimensionale, 135
  - multivariate, 133
  - Spline, 129, 132
  - univariate, 133
  - zweidimensionale, 133
- interpstreamspeed, 370, 377
- Interruptible, 396
  - axes, 400
- intersect, 85
- intmax, 86
- intmin, 86
- inv, 221, 227
- InvertHardcopy, 395
- invhllb, 244, 254
- invoke, 611, 613
- Inzidenzmatrix, 154
- ipermute, 538, 539
- iqr, 181, 190
- isa, 24, 545, 557, 607
- isAllowAxesPan, 329
- isAllowAxesZoom, 329
- isappdata, 427, 430
- isaUnderlying, 481, 486
- isbanded, 256
- isbetween, 565, 568
- iscalendarduration, 570
- iscalenderduration, 565
- iscategorical, 536, 538
- iscategory, 536, 538
- iscell, 519, 520
- iscellstr, 110, 112, 519, 520
- ischange, 158
- ischar, 110, 112
- iscolumn, 106
- iscolumns, 105
- iscom, 613
- isConnected, 143
- isdag, 146
- isdatetime, 565, 570
- isdiag, 256
- isdir, 72
- isdst, 565, 570
- isduration, 565, 570
- isEdge, 139
- isempty, 105, 106
  - tscollection, 181, 190
- isequal, 26, 105, 106
- isequaln, 105, 106
- isevent, 613
- isfield, 519, 522, 523
- isfinite, 86
- isfloat, 105, 106
- isgraphics, 431
- ishandle, 431
- ishermitian, 256
- ishghandle, 431
- ishold, 409
- isIllConditioned, 221, 226
- isinf, 86, 87
- isinteger, 105, 106
- isinterface, 613
- isjava, 607
- isKey, 559
- iskeyword, 206
- isletter, 110, 112
- islocalmax, 158, 159
- islocalmin, 158
- islogical, 105, 106
- ismac, 73
- ismatrix, 105, 106
- ismember, 85
- ismembertol, 85
- ismethod, 545, 558, 603, 611
- ismissing, 158, 162
- isnan, 86, 89
- isnat, 565, 570
- isnumeric, 105, 106
- isobject, 545, 557
- isocaps, 370, 375
- isocolors, 370, 377
- isonormals, 370, 375
- isordinal, 536, 538
- isosurface, 370, 375
- isoutlier, 158, 163
- ispc, 73

- isplaying, 506
- ispref, 456, 457
- isprime, 317
- isprop, 607
- isprotected, 536, 538
- isreal, 305, 306
- isregular, 524, 530
- isrow, 105, 106
- isscalar, 105, 106
- issorted, 158, 168
- issortedrows, 158, 168
- isspace, 110, 112
- issparse, 289
- isstr, 110
- isstring, 110, 112
- isstringScalar, 112
- isstringscalar, 110
- isstrprop, 110, 112
- isstruct, 519, 522, 523
- istudent, 59
- issymmetric, 256
- istable, 524, 526
- istall, 481, 486
- istimetable, 524, 529
- istril, 256
- istriu, 256
- isundefined, 536, 538
- isunix, 73
- isvarname, 206, 207
- isvector, 105, 106
- isweekend, 565, 571
- j, 86
- Jacobi-elliptisches Integral, 313
- Java, 601
  - Internetanbindung, 606
- Java Heap Space, 24
- Java heap space, 70
- java\_array, 605
- javaaddpath, 607
- javaArray, 513, 517, 605
- javachk, 607
- javaclasspath, 607
- javaMethod, 513, 517, 603
- javaObject, 513, 517, 602
- javarmpath, 607
- jet, 344
- JIT Accelerator, 199
- join, 110, 122, 524, 526
- Jordan-Matrix, 248
- juliandate, 565, 569
- Kac-Murdock-Szego-Toeplitz-Matrix, 249
- Kern einer Matrix, 219
- Kerzendigramme, 360
- keyboard, 215
- KeyPressFcn, 397
- KeyReleaseFcn, 397
- keys, 559
- KeyValueDatastore, 483, 485
- Kippschalter, 437
- Klassenattribute, 546
- Klassenverzeichnis
  - ii, 546
- kleinstes gemeinsames Vielfaches, 317
- Kommentare, 86, 199
- komplexe Einheit i,j, 86
- komplexe Zahl
  - Betrag, 305
  - Exponentialdarstellung, 305
  - Phase, 305
  - Phasen, 306
  - Polardarstellung, 305, 360
- Komplexbijugation, 306
- Komponententest, 573
- Komprimierung, 498
- Kondition, 221
- Konstruktor, 549, 550
- Kontrasterhöhung, 382
- Konturplot, 355, 365, 367, 374
- Koordinatentransformationen, 318
- Korrelationskoeffizient, 171
- Kovarianzmatrix, 170
- Kreuzkorrelation, 171
- Kreuzkovarianz, 171
- kron, 81
- Krylov-Matrix, 249
- Kuchendiagramm, 359, 367
- Kugel, 389
- Kurvenanimation, 363, 368
- labeledge, 146, 155
- LabelFontSizeMultiplier, 400
- labelnode, 146, 155
- LabelSpacing, 422
- lag, 524, 530
- LAPACK, 619
- Laplace-Operator, 172
- Laplacematrix, 154
- laplacian, 146, 154
- lasterr, 195
- lasterror, 212, 213
- lastwarn, 212, 213
- LatitudeAxis, 407
- LatitudeLabel, 408
- LatitudeLimits, 404
- Lauchli-Matrix, 249
- Layer, 404
- Layout, 33
  - axes, 400
  - tilelayout, 410
- layout, 146, 155
- lcm, 317
- ldivide, 81, 558
- ldl, 221, 225
- le, 82, 558
- leapseconds, 565, 571
- Least-Square Fit, 230
- Legend
  - axes, 404
- legend, 323, 331, 423
  - AutoUpdate, 423
  - Box, 423
  - ItemHitFcn, 423
  - NumColumns, 423
  - NumColumnsMode, 423
  - Orientation, 423
- legendre, 309, 314
- Legendre-Funktion
  - assoziierte, 314
- Legendre-Polynom, 314
- Lehmer-Matrix, 249
- length, 105
  - Map, 559
  - timeseries, 181, 184
  - tscollection, 181, 190
- Leslie-Populations-Modell, 249
- letterBoundary, 110, 121
- lettersPattern, 110, 119
- LevelList, 422

- LevelListMode, *422*
- LevelStep, *422*
- LevelStepMode, *422*
- libfunctions, 599
- libfunctionsview, 599
- libisloaded, 600
- libpointer, 600
- libstruct, 600
- LibTIFF, *619*
- LibTiff, *490*
- license, 60
- light, 353, 413, 426
  - Color, *426*
  - Position, *426*
  - Style, *426*
- lightangle, 350, 353
- lighting, 346, 347
- line, 413
- lineBoundary, 110, 121
- LineColor, *422*
- LineJoin, 414
- lines, 344
- LineStyle, 321
- LineStyleOrder, *404*
- LineStyleOrderIndex, *405*
- LineWidth, 321, *405*
- Linien
  - Eigenschaften, *321*
- Linien-Objekt, 320
- Linienanimation, *416*
- Linienfarben, *320, 321*
- Linienstil, *320*
- Link Plots, *55*
- linkaxes, 413, 426
- linkdata, 413, 426
- linkprop, 413, 426
  - addprop, 426
  - addtarget, 426
  - removeprop, 426
  - removetarget, 426
- linsolve, 221, 224
- linspace, 97, 98
- List Box, *437*
- ListboxTop
  - uicontrol, *437*
- listdlg, 448, 452
- Listen erzeugen, *197*
- listener, *555*
- listfonts, 427, 429
- Live Editor
  - Datensprünge, 51
  - Datentrends, 51
  - Extrema suchen, 159
  - Figure-Umgebung, 51
  - movie, 51
  - Tabellen kombinieren, 51
  - Tabellen verknüpfen, 51
  - Tabellenwerte verteilen, 51
  - Taimetables kombinieren, 51
  - Timetables, 51
- Live Editor, *49*
  - Animation, 51
  - Daten filtern, 51
  - Daten glätten, 51
  - Debugger, 51
  - Extrema suchen, 51
  - Fehlende Daten, 51
  - Funktionen minimieren, 51
  - Plot, 50
  - Task, 50
  - Task-Code, 51
- Live Functions, 51
- Live Skript
  - publizieren, 49
- Live Skripte, 49
- load, 20, 22, 24, 61
  - COM, 613
- loadlibrary, 598
- loadobj, 64, 558
- localfunctions, 575
- log, 304
- log10, 304
- log1p, 304
- log2, 304
- Logarithmus, *304*
- logical, 91, 105, 106
- loglog, 319, 322, 415
- logm, 242
- logspace, 97, 98
- lokal, 15
- LongitudeAxis, *407*
- LongitudeLabel, *408*
- LongitudeLimits, *405*
- lookAheadBoundary, 110, 121
- Lookaround-Operatoren, *114*
- lookBehindBoundary, 110, 121
- lookfor, 58
- Lotkin-Matrix, *249*
- lower, 110, 123
- ls, 72
- lscov, 221, 230
- lsqminnorm, 221, 231
- lsqnonneg, 221, 230, 259
- lsqr, 298, 299
- lt, 82, 558
- lu, 221, 222, 297
- LU-Zerlegung, *222*
- M-file, 199
- M-Lint Code Checker, *52*
- magic, 244, 255
- Magisches Quadrat, *255*
- makehgtform, 431, 432
- makima, 128, 129
- Map, 558
- Map Container, *558*
- MapCenter, *405*
- MapCenterMode, *405*
- mapreduce, 481, 486
- mapreducer, 481, 488
- Marker, *320*
- MarkerEdgeColor, 321
- MarkerFaceColor, 321
- MarkerIndices, 321
- MarkerSize, 321
- Maschinengenauigkeit, 89
- maskedPattern, 110, 120
- mat
  - Close, 596
  - GetDir, 596
  - GetVariable, 596
  - GetVariableInfo, 596
  - Open, 595
  - PutVariable, 596
- MAT-File, *22, 595*
  - Inhalt, *59*
  - laden, *61*
  - Objekte, *64*
  - Speichern, *62*
- mat2cell, 539, 542
- mat2str, 123
- matches, 110
- matchpairs, 221, 231

- material, 346, 347
- matfile, 62
- MATLAB Execution Engine, 199
- MATLAB-Hilfe, 38
- matlab.codetools.required-FilesandProducts, 66
- matlab.io.hdf4.sd, 503
- matlab.io.hdfeos.gd, 503
- matlab.io.hdfeos.sw, 503
- matlab.lang.
  - makeUniqueStrings, 206, 207
  - makeValidNames, 206, 207
- matlab.mixin
  - .Copyable, 545, 548
  - .SetGet, 545, 548
  - .SetGetExactNames, 545, 548
- matlab.perftest
  - .TestCase, 581
  - .TimeResult, 581
- matlab.ui.internal
  - .JavaMigrationTools, 610, 612
- matlab.unittest, 577
  - .Test, 577
  - .TestCase, 577
  - .TestResult, 577
  - .TestRunner, 577, 579
  - .TestSuite, 577, 579
  - .constraints, 578
  - .diagnostics, 578
  - .fixtures, 578
  - .parameters, 578, 580
  - .plugins, 578
  - .qualifications, 577
  - .selectors, 578
- matlab.wsdll
  - .createWSDLCClient, 493
- matlabdrive, 496, 497
- matlabrc, 59
- matlabroot, 41, 496–498
- Matrix
  - dünn besetzt, 287
  - Inverse, 227
  - Linksinverse, 227
  - Rechtsinverse, 227
  - sparse, 287
  - transponieren, 10
  - zirkulante, 247
- Matrix-Faktorisierung, 222
- Matrixfunktionen, 242
- Matrixinverse, 227
- Matrixmultiplikation, 10
- Matrixnorm, 217
- Matrixpolynome, 126
- Matrizen, 8
  - maximale Größe, 70
- Mauszeiger
  - erstellen, 398
- Max
  - uicontrol, 437
- max, 158, 190
  - timeseries, 181
- maxflow, 146, 151
- MaximizeCommandWindow, 617
- Maximum, 158
- MaximumNumPoints, 416
- maxk, 158, 159
- maxNumCompThreads, 70
- mean, 126, 158, 160, 190
  - timeseries, 181
- Median
  - MAD, 161
- median, 158, 160, 190
  - timeseries, 181
- Medianfilter, 443
- membrane, 435
- memmapfile, 481
  - get, 482
- memory, 70
- menu, 448, 453
- MenuBar, 395
- MenuSelectedFcn, 442
- mergearc, 536, 537
- mergevars, 524, 531
- mesh, 339, 340, 421
- meshc, 339, 340, 421
- meshgrid, 97, 99, 135, 340
- meshz, 339, 340, 421
- Methoden, 549
  - abstrakt, 550
- methods, 545, 548, 549, 603, 611
  - Access, 550, 552
  - listen, 557
  - protected, 553
  - Sealed, 553
- methods tall, 485
- methodsview, 545, 548, 557, 603, 611, 613
- MEX, 584
  - Aufrufpriorität, 587
  - Dateierweiterungen, 585, 588
  - Optionen, 587
- mex, 586
- mex.getCompilerConfigurations, 584
- mexCallMATLAB, 594
- mexCallMatlabWithTrap, 594
- MException, 212, 213
  - AddCause, 214
  - addCorrections, 214
  - eq, 214
  - getReport, 214
  - isequal, 214
  - ne, 214
  - rethrow, 214
  - throw, 214
  - throwAsCaller, 214
- MException.last, 213
- mexErrMsgIdAndTxt, 595
- mexErrMsgTxt, 595
- mexEvalString, 594
- mexEvalStringWithTrap, 594
- mexext, 496, 497, 585
- mexFunction, 585
  - C, 586
  - FORTRAN, 586
- mexGetVariable, 593
- mexPrintf, 594
- mexPutVariable, 593
- mexWarnMsgIdAndTxt, 595
- mexWarnMsgTxt, 595
- mfilename, 206
- mget(ftp), 496
- milliseconds, 565, 566
- Min
  - uicontrol, 437
- min, 158, 190
  - timeseries, 181

- 
- MinimizeCommandWindow, 617
  - Minimum, 158
  - Minimum einer Funktion, 257
  - mink, 158, 159
  - MinorGridAlpha, 405
  - MinorGridAlphaMode, 405
  - MinorGridColor, 405
  - MinorGridColorMode, 405
  - MinorGridLineStyle, 405
  - minres, 298, 300
  - minspantree, 146, 152
  - minus, 80, 558, 568
  - minute, 565, 569
  - minutes, 565, 566
  - mislocked, 206
  - missing, 158, 162
  - Mittel, arithmetisch, 160
  - mkdir, 72
  - mkpp, 132, 133
  - mlapp, 459
  - mldivide, 81, 558
    - decomposition, 227
  - mlint, 78
  - mlintrpt, 78
  - mlock, 206
  - mmfileinfo, 505, 507
  - mod, 307
  - modal, 399
  - mode, 158, 161
  - Modultest, 573
  - month, 565, 569
  - Moore-Penrose-Pseudo-inverse, 227
  - more, 69
  - morebins, 158, 165, 166
  - move
    - COM, 614
  - movefile, 71
  - movegui, 454, 455
  - movevars, 524, 531
  - movie, 351, 385
  - movieview, 448, 451
  - movmad, 158, 161
  - movmean, 158, 160
  - movmedian, 158, 160, 443
  - movprod, 158, 169
  - movstd, 158, 161
  - movsum, 158
  - movvar, 158
  - mpower, 80, 558
  - mput(ftp), 496
  - mrdivide, 81, 558
    - decomposition, 227
  - msgbox, 448, 451
  - mtimes, 80, 558
  - multibandread, 467, 480
  - multibandwrite, 467, 480
  - Multiplikation, 10
  - Multithreading, 70
  - munlock, 206
  - mustBe..., 209
  - Muster
    - erstellen, 118
  - mxAddField, 591
  - mxArray, 585, 587
  - mxCalloc, 593
  - mxClassIDFromClassName, 589
  - mxComplex, 588
  - mxCreate, 593
  - mxCreateCellArray, 591
  - mxCreateCellMatrix, 591
  - mxCreateCharArray, 590
  - mxCreateCharMatrixFromStrings, 590
  - mxCreateDoubleMatrix, 588, 589
  - mxCreateDoubleScalar, 588
  - mxCreateNumericArray, 588
  - mxCreateNumericMatrix, 588
  - mxCreateSparse, 589
  - mxCreateString, 590
  - mxCreateStructArray, 591
  - mxCreateStructMatrix, 591
  - mxDestroyArray, 593
  - mxDuplicateArray, 592
  - mxFree, 593
  - mxGetCell, 591
  - mxGetClassId, 592
  - mxGetClassName, 592
  - mxGetComplexDoubles, 590
  - mxGetData, 590
  - mxGetDoubles, 590
  - mxGetElementSize, 592
  - mxGetEps, 592
  - mxGetField, 591
  - mxGetFieldByNumber, 591
  - mxGetFieldNameByNumber, 591
  - mxGetFieldNumber, 591
  - mxGetImagData, 590
  - mxGetInf, 592
  - mxGetIr, 590
  - mxGetJc, 590
  - mxGetM, 590, 592
  - mxGetN, 590, 592
  - mxGetNaN, 592
  - mxGetNumberOfDimensions, 592
  - mxGetNumberOfElements, 592
  - mxGetNzmax, 590
  - mxGetScalar, 590
  - mxIsCell, 591
  - mxIsChar, 591
  - mxIsClass, 591
  - mxIsComplex, 591
  - mxIsDouble, 591
  - mxIsEmpty, 591
  - mxIsFinite, 591
  - mxIsFromGlobalWS, 591
  - mxIsInf, 591
  - mxIsInt16, 591
  - mxIsInt32, 591
  - mxIsInt64, 591
  - mxIsInt8, 591
  - mxIsLogical, 591
  - mxIsLogicalScalar, 591
  - mxIsLogicalScalarTrue, 591
  - mxIsNaN, 591
  - mxIsNumeric, 591
  - mxIsSingle, 591
  - mxIsSparse, 591
  - mxIsStruct, 591
  - mxIsUInt16, 591
  - mxIsUInt32, 591
  - mxIsUInt64, 591
  - mxIsUInt8, 591
  - mxMalloc, 593
  - mxRealloc, 593
  - mxRemoveField, 591
  - mxSetCell, 591
  - mxSetClassName, 592
  - mxSetComplexDoubles, 592, 593



- mxSetData, 592, 593
- mxSetDimensions, 592
- mxSetDoubles, 592, 593
- mxSetField, 591
- mxSetFieldByNumber, 591
- mxSetImagData, 593
- mxSetIr, 592
- mxSetJc, 592
- mxSetM, 592
- mxSetN, 592
- mxSetNzmax, 592
  
- Nabla-Operator, 172
- Nachinstallation, **67**
- Name, 397
- namedPattern, 110, 120
- namelengthmax, 206, 207
- NaN, 86
- nargchk, 24
- nargin, 19, 208
- narginchk, 208
- nargout, 19, 208
- nargoutchk, 24, 208
- NaN, 565, 567
- native2unicode, 123, 124
- natürlicher Logarithmus, 304
- nccreate, 496, 500
- ncdisp, 496, 499
- nchoosek, 316
- ncinfo, 496
- ncread, 496, 500
- ncreadatt, 496, 500
- ncwrite, 496, 500
- ncwriteatt, 496, 500
- ncwriteschema, 496, 500
- ndgrid, 538, 539
- ndims, 105
- ndinfo, 500
- ne, 82, 558
- nearestNeighbor, 139, 142
- neighbors, 139, 143, 146, 154
- Nested Function
  - Speicherkonzept, 202
- nested function, 200
- NetCDF, 499
- netcdf, 496, 501
- newline, 110, 111
- newplot, 431
- NextPlot, 397, 431
  - axes, 405
  - nextpow2, 304
  - NextSeriesIndex
    - axes, 400
  - nexttile, 409
  - nnz, 288
  - nonzeros, 288
  - norm, 216, 217
  - normalize, 216, 217
  - normest, 216, 217
  - normest1, 216, 217
  - not, 82, 558
  - notify, 545, 556
  - now, 561
  - nsidedpoly, 144
  - nsidepoly, 145
  - nthroot, 305
  - nufft, 175, 180
  - nufftn, 175, 180
  - null, 216, 219
  - Nullmatrix, 97
  - Nullraum, 219
  - Nullstelle, 259
  - num2cell, 539, 543
  - num2hex, 517
  - num2str, 24, 123
  - Number, 397
  - NumberTitle, 397
  - numedges, 146, 149
  - numel, 105
  - numnodes, 146, 149
  - numpartitions, 481, 484
  - nzmax, 289
- Oberflächeninterpolation, 136
- Objektorientierte Programmierung, **545**
  - ode113, 264, 269
  - ode15i, 264, 271
  - ode15s, 264, 267, 269
  - ode23, 264, 269
  - ode23s, 264, 269, 270
  - ode23t, 264, 269
  - ode23tb, 264, 270
  - ode45, 264, 269
  - odeget, 264, 268
  - odephas2, 280, 282
  - odephas3, 280, 282
  - odeplot, 280, 281
  - odeprint, 280, 282
  - odeset, 264, 266
    - events, 267
    - Mass, 269
    - OutputFcn, 281
  - odextend, 280, 281
  - OffCallback, 446
  - OnCallback, 446
  - onCleanup, 61
  - ones, 97
  - open, 65
  - openfig, 431, 433
  - opengl, 393, 399
  - openvar, 43
  - optimget, 257, 259
  - optimset, 257, 259
  - optionalPattern, 110, 119
  - Optionen, 259
  - or, 82, 558
  - ordeig, 233, 236
  - orderfield, 519
  - orderfields, 522
  - ordqz, 233, 236, 237
  - ordschur, 233, 241
  - orient, 335, 336
  - orth, 216, 219
  - otherwise, 194
  - Out-Of-Memory
    - Error, 70
    - java heap space, 70
  - Out-of-Memory, 24
  - outdegree, 146, 154
  - outerjoin, 524, 528
  - OuterPosition, 406
  - Outerposition, 397
  - overlapsrange, 524, 530
- pack, 24, 64
- Package App, 40
- packages, 546
- pad, 110, 111
- Padding, 410
- padcoef, 128, 133
- pan, 323, 329
- panInteraction, 404
- PaperOrientation, 395
- PaperPosition, 395
- PaperPositionMode, 395
- PaperSize, 397



- PaperType, 397
- PaperUnits, 397
- parallelplot, 524, 535
- Parent, 397
  - axes, 406
  - UITabgroup, 440
- pareto, 356, 358, 421
- ParquetDatastore, 483
- partialpath, 498
- partition, 481, 484
- parula, 344
- pascal, 244, 255
- Pascal-Matrix, 255
- Pascalsches Dreieck, 255
- patch, 339, 375, 386, 413, 417, 419
  - categorical, 386
  - datetime, 386
  - duration, 386
  - Farbinterpolation, 387
  - structure, 386
- Patch-Objekt, 348, 386
- path, 67
  - dialog box, 67
  - set, 60, 67
- path2rc, 67
- pathdef, 60
- pathdef.m, 67
- pathsep, 496, 497
- pathtool, 67
- Pattern
  - boundary, 120
- pattern, 110, 118, 118
- pause, 215, 506, 511, 563, 565
- pbaspect, 339, 341
- pcg, 298, 299
- pchip, 128, 129
- pcode, 65
- pcolor, 365, 366
- pdepe, 283
- pdeval, 286
- peaks, 343
- Pei-Matrix, 250
- perl, 73
- perms, 316
- Permutation, 316
- permute, 538, 539
- persistent, 205
- Pfadname, partieller, 498
- pi, 86
- PickableParts, 406
- pie, 356, 359
- pie3, 367
- pink, 344
- pinv, 221, 227, 228
- planerot, 232, 233
- play, 505, 506
- playblocking, 506
- playshow, 57
- Plot
  - Datenverknüpfung, 55, 426
  - Doppelachsen, 322
  - Markierungen, 320
  - mehrere, 324, 332
- plot, 11, 319, 414
  - Graphen, 146, 154
  - table, 525
  - timeseries, 181
- Plot Browser, 54
- Plot Edit Toolbar, 54
- Plot Tools
  - grafische, 53
- plot3, 14, 339, 415
- PlotBoxAspectRatio, 406
- PlotBoxAspectRatioMode, 406
- plotbrowser, 454, 456
- plottedit, 323, 332
- plotmatrix, 356, 362
- PLOTS
  - Registerkarte, 36
- plottools, 454, 456
- plotyy, 322
- plus, 80, 558
  - strings, 122
  - Zeichen, 110
- Pointer, 398
- PointerShapeCData, 398
- PointerShapeHotSpot, 398
- pointLocation, 139, 142
- Poisson-Gleichung, 250
- pol2car, 318
- polaraxes, 400
- polarbubblechart, 416
- polarhistogram, 158, 356, 360
- polarplot, 319, 322, 415
- poly, 125, 233, 239, 245
- polyarea, 144
- polyder, 19, 127
- polyeig, 233, 239
- polyfit, 19, 127, 128
- Polygammafunktion, 312
- Polygone, 144
- polyint, 127
- Polymorphie, 553
- Polynom, 125
  - Ableitung, 127
  - charakteristisches, 127, 245
  - Integration, 127
- Polynomdivision, 127
- Polynome, 19
- Polynomfit, 19, 127
- Polynommultiplikation, 127
- polyshape, 144, 145
- polyval, 19, 125
- polyvalm, 125
- Pop-up-Menü, 437
- Position, 398
  - Achse, 324
  - axes, 406
  - UIcontextmenu, 443
  - UImenu, 442
- PositionConstraint, 406
- Positionsvektor, 145
- posixtime, 565, 569
- possessivePattern, 110, 120
- pow2, 305
- power, 80, 558
- ppval, 128, 132, 133
- Präferenzen, 59
- predecessor, 154
- predecessors, 146
- prefdir, 496, 497
- preferences
  - Format, 70
- preview, 467, 469, 470, 481, 483, 484
- primes, 317
- Primzahlen, 317
- Primzahlzerlegung, 317
- print, 335, 336
- printdlg, 448, 450
- printopt, 335, 336
- printpreview, 448, 450
- prism, 344

- private, 66
  - directory, 202
- prod, 158, 169
- Produkt, 169
  - gleitendes, 169
  - kumulatives, 169
- profile, 77
- Profiler, 45, 53
- profsave, 78
- Programmeffizienz, 53
- Projection, 406
- propedit, 611
- properties, 545, 550
  - Dependent, 551
- Property Editor, 54
- Property Inspector, 54
- propertyeditor, 454, 456
- psi, 309
- publish, 48
- Push Button, 437
- PutCharArray, 616
- PutFullMatrix, 616
- PutWorkspaceData, 616
- pwd, 72
- py
  - importlib, 608
  - reload, 608
- py., 608
  - bytes, 609
  - help, 608
  - keyword, 608
  - Methoden, 608
  - str, 609
- pyenv, 607
- Python
  - Fehler, 609
  - Modul, 608
  - Suchpfad, 608
- qmr, 298, 301
- qr, 221, 225
  - sparse, 290
- QR-Zerlegung, 225
- qrdelete, 232, 233
- qrinsert, 232, 233
- qrupdate, 221, 226, 232, 233
- quad, 261
- quad2d, 261, 262
- quadgk, 261
- quadl, 261
- Quadratur, 261
- Quadratwurzel, 305
- quadv, 261
- quarter, 565, 569
- questdlg, 448, 451
- quit, 61
- Quit(COM), 617
- quiver, 370, 371, 415
  - AutoScale, 415
  - AutoScaleFaktor, 415
  - MaxHeadSize, 415
  - Pfeileigenschaften, 415
  - ShowArrowHead, 415
- quiver3, 370, 371, 415
  - Pfeileigenschaften, 415
- qz, 233, 236
- QZ-Faktorisierung, 236
- Radio Button, 437
- rand, 97, 101
- randi, 97, 101
- randn, 97, 101
- randperm, 101, 105
- RandStream, 97, 101, 102
  - Methoden, 104
  - Verfahren, 104
- Randwertprobleme, 276
- Rang, 218
- rank, 216, 218
- rat, 317
- rats, 317
- RAxis, 407
- RAxisLocation, 407
- rbbox, 434, 447
- RColor, 407
- RColorMode, 407
- rcond, 220–222
- RDir, 407
- rdivide, 81, 558
- read, 481, 484
  - serial, 504
- readall, 481, 484, 485
- readcell, 519, 520
- readimage, 481, 485
- readmatrix, 467
- readtable, 524, 532
- readtimetable, 524
- real, 305, 306
- reallog, 304
- realmax, 86, 89
- realmin, 86, 89
- realpow, 305
- realsqrt, 305
- Realteil, 306
- RearrangeableColumn, 441
- rectangle, 413, 417
- rectint, 144
- recycle, 72
- Redheffer-Matrix, 252
- reducepatch, 386, 388
- reducevolume, 370, 381
- refresh, 393, 399
- refreshdata, 427, 430
- regexp, 26, 110, 115
- regexpi, 110, 115
- regexpPattern, 110, 119
- regexprep, 110, 116
- regexptranslate, 110, 117
- regionZoomInteraction, 404
- registerevent, 611
- Registerkarte
  - HOME, 33
- regmatlabserver, 615
- reguläre Ausdrücke, 113
  - logische Operatoren, 114
  - lookaround-Operatoren, 114
  - Quantifier, 114
  - spezielle Character, 114
- rehash, 67
  - path, 67
  - pathreset, 67
  - toolbox, 67
  - toolboxcache, 67
  - toolboxreset, 67
- release, 614
- rem, 307
- remapfig, 454, 456
- remove, 560
- removecats, 536, 537
- removestyle, 442
- removets, 181, 191
- rename(ftp), 496
- renamecats, 536, 537
- renamevars, 524, 531
- Renderer, 398
- RendererMode, 398

- 
- reordercats, 536, 537
  - reordernodes, 146
  - repelem, 97, 99, 100
  - replace, 110, 123
  - replaceBetween, 110, 123
  - repmat, 26, 97, 99, 100
  - resample, 181, 184
    - tscollection, 191
  - rescale, 216, 218
  - reset, 427, 481, 484
  - reshape, 26, 90, 95
  - residue, 127
  - Residuum, 127
  - Resize, 398
  - restoredefaultpath, 68
  - resume, 506
  - rethrow, 212, 213
  - retime, 524, 530
  - return, 73, 196, 215
  - reverse, 110, 123
  - RGB-Farben, 381
  - rgb2gray, 381, 383
  - rgb2hsv, 381, 383
  - rgb2ind, 381, 383
  - rgbplot, 381, 383
  - RGrid, 328
  - ribbon, 367, 368, 421
  - Riemann-Matrix, 252
  - RLim, 408
  - rlim, 323, 330
  - RLimMode, 408
  - rmappdata, 427, 430
  - rmdir, 72
  - rmedge, 146, 149
  - rmfield, 519, 522
  - RMinorGrid, 408
  - RMinorTick, 408
  - rmmissing, 158, 162
  - rmnode, 149
  - rmoutliers, 158, 163
  - rmpath, 67
  - rmpref, 456
  - rmprop, 524, 532
  - rng, 97, 101
  - roots, 19, 125, 245
  - rose, 415
  - rosser, 244, 246, 252
  - Rosser-Matrix, 252
  - rot90, 90, 95
  - rotate, 385, 386
  - rotate3d, 348
  - rotateInteraction, 404
  - Rotation, 370
  - round, 307
  - rowfun, 539, 541
  - RowName, 441
  - rows2vars, 524, 532
  - RowStriping, 442
  - rref, 216, 219
  - rsf2csf, 232, 233, 241
  - RTick, 408
  - rtickangle, 323, 330
  - rtickformat, 323, 330
  - RTickLabel, 408
  - RTickLabelMode, 408
  - RTickLabelRotation, 408
  - rticklabels, 323, 331
  - RTickMode, 408
  - rticks, 323, 330
  - rulerPanInteraction, 404
  - Run
    - Fehler, 45
    - Unit Test, 579
  - Rundungsfehler
    - relativer, 89
  - Rundungsfehler, 411
  - Runge-Funktion, 130
  - runperf, 581
  - runttests, 573, 574
  - save, 22, 24, 62
    - COM, 613
  - saveas, 62, 335
  - savefig, 337, 431, 433
  - saveobj, 64, 558
  - savepath, 67, 68
  - Scalebar, 406
  - scatter, 356, 362, 415
  - scatter3, 367, 368, 415
  - scatteredInterpolant, 128
  - Schieber, 437
  - Schlüsselworte, 206
  - schur, 233, 240
  - Schur-Form, 240
  - Scrollable
    - uibuttongroup, 439
  - scrollable, 395
  - search, 58
  - sec, 303
  - secd, 303
  - sech, 304
  - second, 565, 569
  - seconds, 565, 566
  - selctIf, 579
  - Selected
    - axes, 400
  - SelectedObject, 439
  - SelectedTab, 440
  - SelectionChangedFcn, 439
  - SelectionHighlight
    - axes, 400
  - SelectionType, 395
  - semilogx, 319, 322, 415
  - semilogy, 319, 322, 415
  - sendmail, 493, 494
  - Separator, 442
  - serial, 504
  - serialport, 504
  - serialportlist, 504
  - set, 427, 506, 603
    - COM, 611, 613
    - timeseries, 181, 183
    - tscollection, 181, 190
  - set path, 67
  - setabstime, 181, 185
    - tscollection, 191
  - setAllowAxesPan, 329
  - setAllowAxesZoom, 329
  - setappdata, 427, 430
  - setAxesPanMotion, 329
  - setAxesZoomMotion, 329
  - setcats, 536, 537
  - setdiff, 85
  - setenv, 73
  - setfield, 519, 522
  - setinterpmethod, 181, 187
  - setpref, 456, 457, 494, 495
  - settimeseriesnames, 181, 191
  - setup, 577
  - setupOnce, 577
  - setvaropts, 467, 470
  - setvartype, 467, 470
  - setxor, 85
  - sftp, 495
  - shading, 346
  - ShadowColor

- uibuttongroup, *439*
- shadowed function, *66*
- shared-data-copy, *201*
- shg, 393, 399
- shiftdim, 90, 95
- Short-Circuit-Operatoren, *82*
- Shortcut
  - eigene, *35*
- shortcuts
  - keyboard, *35*
- shortestpath, 146, 153
- shortestpathtree, 146, 153
- showplottool, 338
- ShowText, *422*
- shrinkfaces, 386, 388
- sign, 307, 308
- sin, 303
- sind, 303
- single, 513, 514
- singleCompThread, 71
- Singulärwertzerlegung, *239*
- sinh, 304
- sinpi, 303
- size, 105, 139, 143
  - Map, 560
  - tscollection, 181, 190
- SizeChangedFcn, *395, 439*
- SizeData, 416
- SizeDataSource, 416
- Skript, *199*
- Skripte, 15
- slice, 370, 372
- slider, *437*
- SliderStep, *437*
- smooth3, 370
- sn, 314
- snapnow, 48
- SO-Files, *598*
- sort, 158, 167
- Sortieralgorithmus, *167*
- SortMethod, *400*
- sortrow
  - tables, 526
- sortrows, 158, 167
- sound, 173, 505, 511
- soundsc, 505, 511
- soundview, 448, 451
- spalloc, 289
- sparse, 24, 288
- spaugment, 290
- spconvert, 288
- spdiags, 292
- specular, 346, 347
- SpecularColorReflectance, *418*
- SpecularExponent, *418*
- SpecularStrength, *418*
- Speicher
  - maximal addressierbar, **70**
- speye, 292
- spfun, 289
- sph2cart, 318
- sphere, 386, 389
- spinmap, 381, 383
- spline, 128, 132
- Spline-Interpolation, *132*
- split, 110, 565, 566
- splitapply, 539, 541
- splitlines, 110
- splitvars, 524, 531
- spones, 289
- spparms, 290, 297
- sprand, 292, 293
- sprandn, 292, 293
- sprandsym, 292, 293, 297
- sprank, 216, 218
- spreadsheetDatastore, *483*
- SpreadsheetImportOptions, *467, 470*
- spring, 344
- sprintf, 24, 212, 467, 478
- Spur, 218
- spy, 289, 297
- sqrt, 305
- sqrtm, 242, 305
- squeeze, 90, 94
- sscanf, 467, 478
- stack, 524, 532
- stackedplot, 319, 321, 524
  - table, 526
  - timetable, 525
- stairs, 357, 359, 415
- Standardabweichung, *161*
  - gleitende, 161
- standardizeMissing, 158, 162
- start, 572
- startat, 572
- startsWith, 110
- startup, 60, *394*
- startwith, 118
- State, *446*
- std, 126, 158, 161, 190
  - timeseries, 181
- stem, 357, 360, 415
- stem3, 367, 368
- stop, 506, 572
- Stoppuhr, *565*
- str2double, 123
- str2func, 203
- str2num, 123
- strcat, 26, 110, 123
- strcmp, 26, 110, 118
- strcmpi, 27, 110, 118
- stream2, 370, 377
- stream3, 370, 377
- streamline, 370, 377, 415
- streamparticles, 370, 377, 379, 415
- streamribbon, 370, 377, 421
- streamslice, 370, 377
- streamtube, 370, 377
- Streudiagramm, *368*
- Streuplot, *362*
  - Farbe, *415*
  - Transparenz, *416*
- strfind, 110, 117
- String, *109*
  - uicontrol, *437*
- string, 110, 111
- String-Array, *109*
- strings, 110, 111
- strip, 110, 111
- strjoin, 110
- strjust, 110, 111
- strlength, 105
- strncmp, 110, 118
- strncmpi, 110, 118
- Strömungsbilder, *377*
- strrep, 110, 123
- strsplit, 122
- strtok, 110, 118
- strtrim, 110, 111
- struct, 23, 519, 521
  - figure, 445
- struct2cell, 539, 544
- struct2table, 539, 543

- structfun, 522, 539, 541
- structure, 11
- Struktur-Arrays, 521
- Strukturen, 521
  - Felder, 521
- Strukturvariablen, 11
- Style
  - uicontrol, 437
- Style Properties, 442
- sub2ind, 90
- Subclasses, 547, 551
- subgraph, 146, 150
- subplot, 12, 319, 323, 324
  - polaraxes, 326
- subsasgn, 558
- subsindex, 558
- subspace, 172
- subsref, 558
- Substream, 102, 105
- Subtitle, 406
- subtitle, 323
- SubtitleFontWeight, 406
- subvolume, 370, 380
- successors, 146, 154
- Suchpfad, 60, 66
- sum, 158, 168, 190
  - timeseries, 181
- summary, 524, 534, 536, 538
- Summe, 168
  - gleitende, 169
  - kumulative, 169
- summer, 344
- Superclasses, 547
- surf, 14, 339, 340, 417, 420, 421
  - Bucheinband, 341
- surf2patch, 386, 388
- surface, 340, 413, 417, 420
- Surface-Objekt, 348, 388
- surfc, 339, 340, 421
- surf1, 346, 347
- surfnorm, 346, 347, 372
- svd, 233, 239, 250
- svds, 233, 240
- svdsketch, 233, 239
- SVN, 37
- swapbytes, 84
- swarmchart, 416
- swarmchart3, 416
- switch, 24, 194
- symamd, 291, 294, 296
- symbfact, 290, 301
- symmlq, 298
- symrcm, 294, 297
- symvar, 257, 260
- synchronize, 181, 188, 524, 530
- syntax, 58
- system, 73
- system\_dependent Dump-Mem, 70
- tabel2array, 543
- Tabelle
  - Eigenschaften, 526
- Tabellen, 524
  - Live-Editor, 524
  - sortieren, 526
  - verknüpfen, 526
- Tabellenvariablen, 11
- table, 11, 524
  - properties, 526
- table2array, 539
- table2cell, 539, 543
- table2struct, 539, 544
- table2timetable, 524, 531
- Tabs
  - HOME, 33
- TabularTextDatastore, 483
- tabularTextDatastore, 483
- Tag
  - axes, 406
- tag, 398
- tail, 486, 524
- tall, 481, 485
  - methods, 485
- Tall Arrays, 485
- TallDatastore, 483
- tan, 303
- tand, 303
- tanh, 304
- tar, 498
- Tastaturkürzel, 35
- teardown, 577
- teardownOnce, 577
- Teiler
  - größter gemeinsamer, 317
- tempdir, 496, 497
- tempname, 496, 497
- Tessalation, 139
- Testmatrizen, 246
- testrunner, 573, 575
- testsuite, 573, 575
- tetramesh, 139, 145
- texlabel, 323, 334
- Text
  - Eigenschaften, 333, 334
  - Interpreter, 335
  - UImenu, 442
- text, 323, 334, 413
- textBoundary, 110, 121
- Textfeld
  - editierbares, 437
  - statisches, 437
- TextList, 422
- TextListMode, 422
- textscan, 467, 472
- TextStep, 422
- TextStepMode, 422
- textwrap, 434, 447
- tfqmr, 298, 301
- ThetaAxis, 407
- ThetaColor, 407
- ThetaColorMode, 407
- ThetaDir, 407
- ThetaGrid, 328
- ThetaLim, 408
- thetalim, 323, 330
- ThetaLimMode, 408
- ThetaMinorGrid, 408
- ThetaMinorTick, 408
- ThetaTick, 408
- thetatickformat, 323, 330
- ThetaTickLabel, 408
- ThetaTickLabelMode, 408
- thetaticklabels, 323, 331
- ThetaTickMode, 408
- thetaticks, 323, 330
- ThetaZeroLocation, 406
- tic, 563, 564
- TickDir, 406
- TickDirMode, 406
- TickLabelFormat, 406
- TickLabelInterpreter, 406
- TickLength, 406
- TIFF
  - close, 492

- computeStrip, 492
- computeTile, 493
- currentDirectory, 493
- Eigenschaften, 491
- getTag, 493
- getTagNames, 493
- getVersion, 493
- isTiled, 493
- lastDirectory, 493
- Methoden, 492
- nextDirectory, 493
- numberOfStrips, 492
- numberOfTiles, 493
- read, 492
- readEncodedTile, 492, 493
- rewriteDirectory, 493
- setDirectory, 493
- setSubDirectory, 493
- setTag, 493
- Tags, 491
- write, 492
- writeDirectory, 493
- writeEncodedStrip, 493
- writeEncodedTile, 493
- Tiff, 490
- TightInset, 400
- TileArrangement, 410
- TiledChartLayout Objekte, 409
- tiledlayout, 409
- tilelayout, 410
- TileSpacing, 410
- time, 565, 567
- timeit, 563, 564
- timeofday, 565, 568
- timer, 571
- timerange, 524, 529
- timerfind, 572
- timerfindall, 572
- times, 80, 558
- timeseries, 181
  - Quality, 182
  - QualityInfo, 182
  - TimeInfo, 190
- timetable, 524, 528
- timetable2table, 524, 531
- timezones, 565, 568, 571
- Titel
  - löschen, 407
- Title, 407
  - uibbuttongroup, 439
- title, 323, 331
- TitleFontSizeMultiplier, 407
- TitleFontWeight, 407
- TitleHorizontalAlignment, 407
- TitlePosition
  - uibbuttongroup, 439
- toc, 563, 564
- todatenum, 499
- TODO/FIXME Report, 37
- toeplitz, 244, 254
- Toeplitz-Matrix, 247, 254
- Toggle Button, 437
- Token, 115
- ToolBar, 395
- Toolbar
  - erzeugen, 445
- Toolbox
  - Dokumentation, 41
  - erstellen, 41
  - Installationsfile, 41
  - version, 41
- toolboxdir, 496
- Toolstrip, 33
- TooltipString, 438
- topkrows, 158, 168, 486
- toposort, 146
- Tortendiagramm, 367
- Tortendiagramme, 359
- trace, 216, 218
- transclosure, 146, 153
- transpose, 558
  - timeseries, 181, 184
- transreduction, 146
- trapz, 158, 169
- treelayout, 301
- treepplot, 301
- Trend, linearer, 175
- Treppendiagramme, 359
- Triangulation, 139
- triangulation, 140
  - barycentricToCartesian, 141
  - cartesianToBarycentric, 141
  - circumcenter, 143
- ConnectivityList, 140, 141
- edgeAttachments, 143
- edges, 143
- faceNormal, 143
- featureEdges, 143
- freeBoundary, 143
- incenter, 143
- isConnected, 143
- nearestNeighbor, 142
- neighbors, 143
- pointLocation, 142
- Points, 140
- size, 143
- vertexAttachments, 143
- vertexNormal, 143
- trigonometrische Funktionen, 303
- tril, 90, 97
- trimesh, 139, 145
- triplequad, 261, 262
- triplot, 139, 145
- trisurf, 139, 145
- triu, 90, 97
- true, 90, 91
- True Color, 381
- True-Color-Format, 383
- try, 24, 195
  - catch ME, 213, 215
- tscollection, 181, 190
  - TimeInfo, 190
- tsdata.event, 181, 188
- tsdata.interpolation, 187
- tsearchn, 139, 140
- tsprops, 181, 182
- Type
  - axes, 407
  - figure, 398
  - tiledlayout, 410
- type, 64
- typecast, 513, 516
- tzoffset, 565, 571
- uialert, 448, 452
- uiaxes, 400
  - allchild, 429
- uibutton, 434, 443
  - Icon, 436
- uibbuttongroup, 434, 439
- uiconfirm, 448, 452

- uiconfirm , 452
- UINavigationController
  - figure, 398
- UINavigationController
  - axis, 400
- uicontextmenu, 434, 442
- uicontrol, 215, 434
  - bebildern, 435
- UIFigure
  - testen, 445
- uifigure, 393, 394
- uifigures
  - allchild, 429
- uigetdir, 448
- uigetfile, 448
- uigetpref, 456, 457
- uiimport, 55
- uiknob, 443
- uilabel, 443
- uimenu, 215, 434, 442, 443
- uint16, 513, 514
- uint32, 513, 514
- uint64, 513, 514
- uint8, 307, 513, 514
- uiopen, 448, 449
- uipanel, 434, 439
- uiprogressdlg, 448, 453
- uipushtool, 434, 445
- uiputfile, 448
- uiresume, 434, 446
- uisave, 448, 449
- uisetcolor, 448, 451
- uisetfont, 448, 450
- uisetpref, 456, 457
- uistack, 434, 446
- uistyle, 442
- uitab, 434, 440
- uitabgroup, 434, 440
- uitable, 434, 440
- uitoggletool, 434, 445
- uitoolbar, 434, 445
- uiwait, 434, 446
- UMFPACK, 619
- uminus, 80, 558
- unicode2native, 123, 124
- union, 85
- unique, 86
- uniquetol, 86
- Unit Test, 573
- Assertable Class, 575
- Assumable Class, 575
- fatalAssertable Class, 575
- interaktiv, 576
- run, 579
- Verifiable Class, 575
- Units
  - axes, 407
  - figure, 398
  - uicontrol, 438
- unix, 73
- unloadlibrary, 600
- unmesh, 302
- unmkpp, 128, 132, 133
- unregisterallevents, 613
- unregisterevent, 613
- unstack, 524, 532
- untar, 498
- Unterfunktion, 202
- Unterfunktionen, 200
  - Hilfe, 497
- unvollständiges elliptisches
  - Integral 1. Gattung, 313
- unwrap, 305
- unzip, 496, 498
- uplus, 80, 558
- upper, 110, 123
- usejava, 607
- UserData, 398, 438
  - axes, 407
- userpath, 68
- validateattributes, 105, 107
- validatestring, 105, 108
- values, 560
- vander, 244, 253
- Vandermonde-Matrix, 253
- var, 158, 161, 190
  - timeseries, 181
- varargin, 19, 208
- varargout, 19, 208
- varfun, 539, 540
  - Beispiel, 581
- Variable
  - global, 25
- Variable Editor, 42
- Variablen, 207
  - erzeugen, 7
- Variablennamen erzeugen, 197
- Varianz, 161
  - gleitende, 161
- vartype, 524, 531
- vecnorm, 216, 217
- Vektorisierung, 192
- Vektornorm, 216
- ver, 58
- Vererbung, 547
- Verifiable Class, 575
- Verify-Klasse (testen), 575
- verLessThan, 58
- version, 58
  - java, 601
- Versionskontrolle, 37
- vertcat, 558
  - Beispiel, 581
  - tscollection, 181, 191
- vertexAttachments, 139, 143
- vertexNormal, 143
- VertexNormals, 419
- VertexNormalsMode, 419
- Vertices, 419
- vga, 344
- VideoReader, 505, 510
  - Eigenschaften, 509
- VideoReader-Klasse, 507
- VideoWriter, 505, 507
  - Eigenschaften, 509
- VideoWriter-Klasse, 507
- Vielfaches
  - kleinstes gemeinsames, 317
- View, 407
- view, 348
- viewmtx, 348
- Visible, 398, 407
  - uicontextmenu, 442
- vissuite, 369
- vollständige elliptische Integrale
  - 1. Gattung, 313
  - 2. Gattung, 313
- volumebounds, 370, 381
- Volumenvisualisierung, 369
  - Isoflächen, 375
  - Isonormale, 375
  - Konturflächen, 375



- Schnitte, 372  
 Strömungsdarstellung, 377  
 voronoi, 144  
 Voronoi-Diagramm, 144  
 voronoiDiagram, 139, 140  
 voronoin, 144  
  
 wait, 572  
 waitbar, 448, 453  
 waitfor, 434, 446  
 waitforbuttonpress, 434, 446  
 warndlg, 448, 451  
 warning, 212  
 Wasserfall-Diagramm, 368  
 waterfall, 367, 368  
 web, 493, 494  
 weboptions, 494  
 webread, 493, 494  
 websave, 494  
 webwrite, 493, 494  
 week, 569  
 weekday, 563, 564  
 Werkzeugleiste, 33  
 what, 64  
 which, 65  
     all, 66  
 while, 193  
 white, 344  
 whitebg, 344, 346  
 whitespaceBoundary, 110, 121  
 whitespacePattern, 110, 119  
 who, 59  
 whos, 8, 59  
     file, 22  
 why, 86  
 width, 524, 528  
 wildcardPattern, 110  
 wildcradPattern, 119  
 wilkinson, 244, 246, 253  
 Wilkinson-Matrix, 253  
 wind, 370  
 WindowButtonDownFcn, 399  
 WindowButtonMotionFcn, 399  
 WindowButtonUpFcn, 399  
 WindowKeyPressFcn, 399  
 WindowKeyReleaseFcn, 399  
  
 WindowScrollWheelFcn, 395  
 WindowState, 395  
 WindowStyle, 399  
 Winkelhistogramm, 360  
 winopen, 65  
 winqueryreg, 72  
 winter, 344  
 withinrange, 524, 530  
 withtol, 524, 530  
 workspace, 59  
 Workspace Browser, 36  
 write, 481, 486  
     serial, 504  
 writecell, 519  
 writematrix, 467  
 writetable, 524, 532, 534  
 writetimetable, 524, 534  
 WSDL-Klassen, 493  
  
 XAxis, 407  
 XAxisLocation, 407  
 XColor, 407  
 XColorMode, 407  
 xcorr, 171  
 xcov, 171  
 XData  
     image, 423  
     patch, 419  
     surface, 419  
 XDataMode, 414  
 XDataSource, 414  
 XDir, 407  
 XDisplay, 399  
 XEndPoints, 422  
 XGrid, 328, 407  
 XJitter, 416  
 XJitterWidth, 416  
 XLabel, 408  
 xlabel, 323, 330  
 XLim, 408  
 xlim, 323, 330  
 XLimMode, 408  
 XMinorGrid, 408  
 XMinorTick, 408  
 XML, 501  
 XMLImportOptions, 467, 470  
 xmlread, 496, 501  
 xmlwrite, 496, 501  
 xmReal, 588  
  
 XNegativeDelta, 415  
 XNegativeDeltaSource, 415  
 xor, 82  
 XPositiveDelta, 415  
 XPositiveDeltaSource, 415  
 XScale, 408  
 xslt, 496, 502  
 XTick, 328, 408  
 xtickangle, 323, 330  
 xtickformat, 323, 330  
 XTickLabel, 328, 408  
 XTickLabelMode, 408  
 XTickLabelRotation, 408  
 xticklabels, 323, 331  
 XTickMode, 408  
 xticks, 323, 330  
  
 YAxis, 407  
 YAxisLocation, 407  
 YColor, 407  
 YColorMode, 407  
 YData  
     image, 423  
     patch, 419  
     surface, 419  
 YDataSource, 414  
 YDir, 407  
 year, 565, 569  
 years, 565, 566  
 YEndPoints, 422  
 YGrid, 328, 407  
 YJitter, 416  
 YJitterWidth, 416  
 YLabel, 408  
 ylabel, 323, 330  
 YLim, 408  
 ylim, 323, 330  
 YLimMode, 408  
 ymd, 565, 569  
 YMinorGrid, 408  
 YMinorTick, 408  
 YNegativeDelta, 415  
 YNegativeDeltaSource, 415  
 YPositiveDelta, 415  
 YPositiveDeltaSource, 415  
 YScale, 408  
 YTick, 408  
 ytickangle, 323, 330  
 ytickformat, 323, 330



- YTickLabel, *408*
- YTickLabelMode, *408*
- YTickLabelRotation, *408*
- yticklabels, *323, 331*
- YTickMode, *408*
- yticks, *323, 330*
- yyaxis, *319, 322*
- yyyymmdd, *565, 569*
  
- Z-Score, *217*
- ZAxis, *407*
- ZColor, *407*
- ZColorMode, *407*
- ZData
  - patch, *419*
  - surface, *419*
- ZDataSource, *414*
- ZDir, *407*
- Zeichenarrays, *109*
- Zeichenfolgenarrays, *109*
- Zeit, *561*
- Zeitachsen, *569*
- Zeitreihen
  - Daten-Sample, *183*
  - Ereignisse, *188*
  - Zeitreihengruppen, *190*
- Zeittabellen, *528*
  - Live-Editor, *524*
- Zellvariable, *519*
- Zellvariablen, *11*
- Zerlegung indefiniter Matrizen, *225*
- zeros, *10, 97*
- ZGrid, *407*
- zip, *496, 498*
- ZJitter, *416*
- ZJitterWidth, *416*
- ZLabel, *408*
- zlabel, *323, 330*
- ZLim, *408*
- zlim, *323, 330*
- ZLimMode, *408*
- ZMinorGrid, *408*
- ZMinorTick, *408*
- zoom, *323, 328*
- zoomInteraction, *404*
- ZoomLevel, *408*
- ZScale, *408*
  
- ZTick, *408*
- ztickangle, *323, 330*
- ztickformat, *323, 330*
- ZTickLabel, *408*
- ZTickLabelMode, *408*
- ZTickLabelRotation, *408*
- zticklabels, *323, 331*
- ZTickMode, *408*
- zticks, *323, 330*
- Zufallsmatrizen, *101, 251, 253*
- Zufallspermutation, *101*
- Zufallssequenz, *102*
  - lokale, *102*
- Zufallsverteilung, *101*
  - Anfangswert, *102*
  - ganzzahlig, *101*
  - gleichverteilt, *101*
  - normalverteilt, *101*
    - Mittelwert, *102*
    - Standardabweichung, *102*
- Zwischenablage, *455*
- Zylinder, *389*
