# Supplementary material
Source: publisher site journal article supplement (https://www.degruyterbrill.com/publication/isbn/9783110741780/downloadAsset/9783110741780_Beispiele.zip)

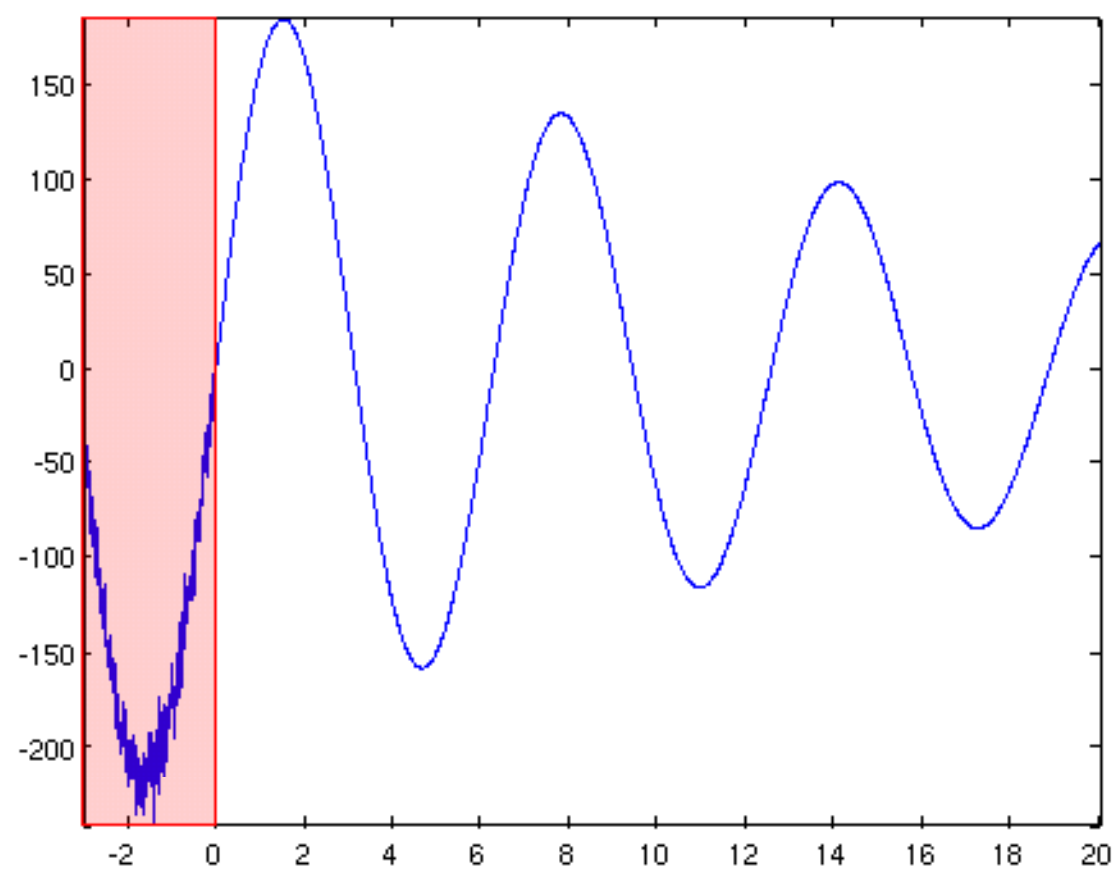

Supplement: Supplementary file 1 [file 9783110741780_Beispiele.zip]

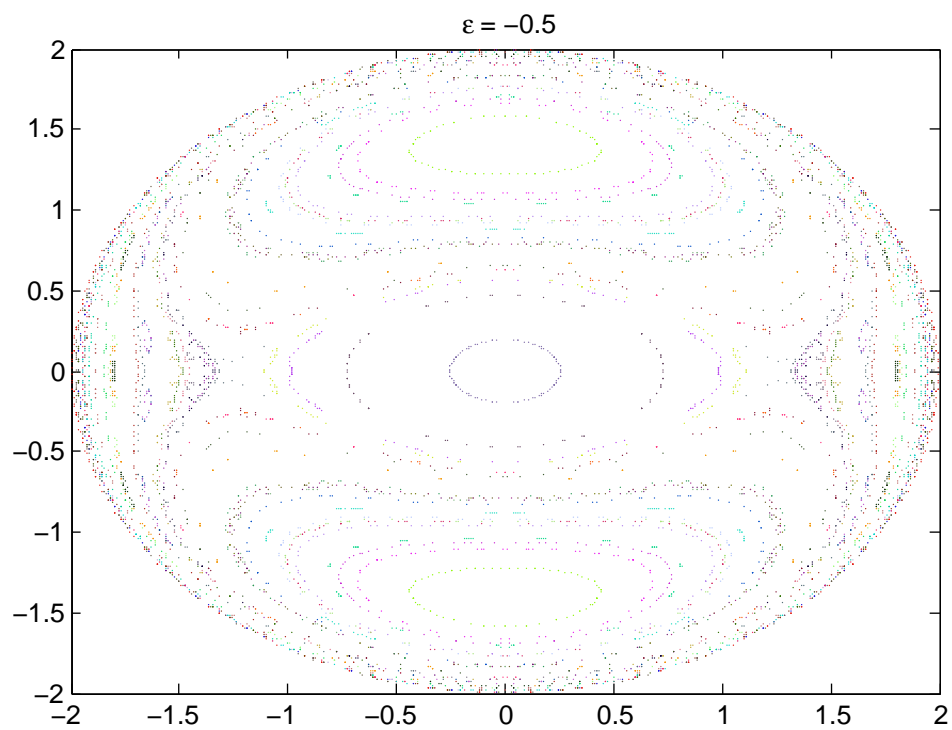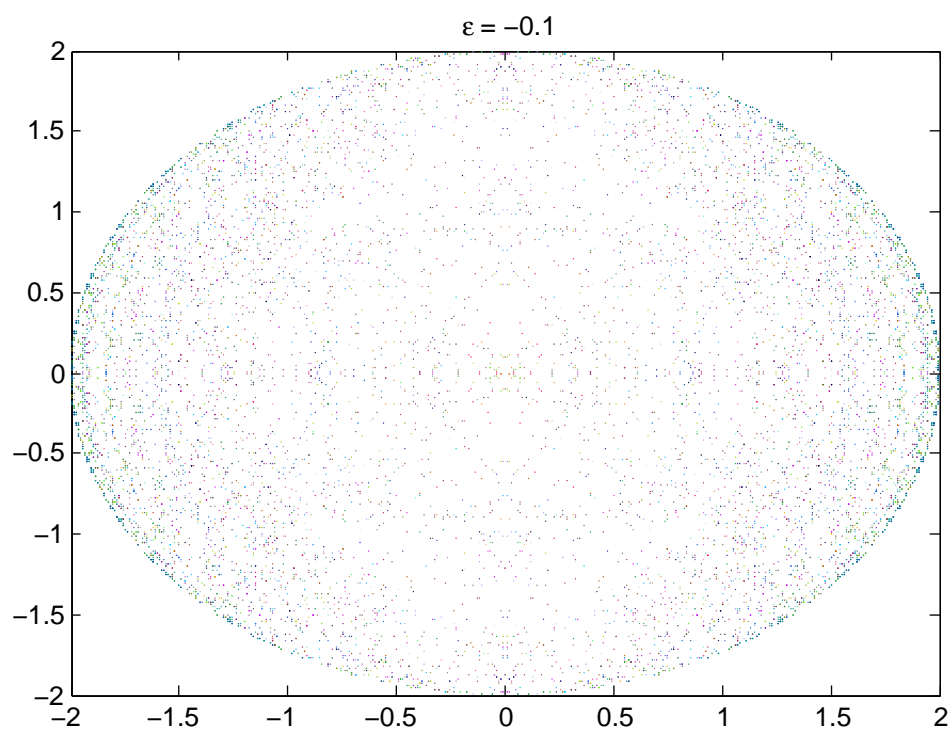

Supplement: Supplementary file 3 [file 9783110741780_Beispiele.zip]

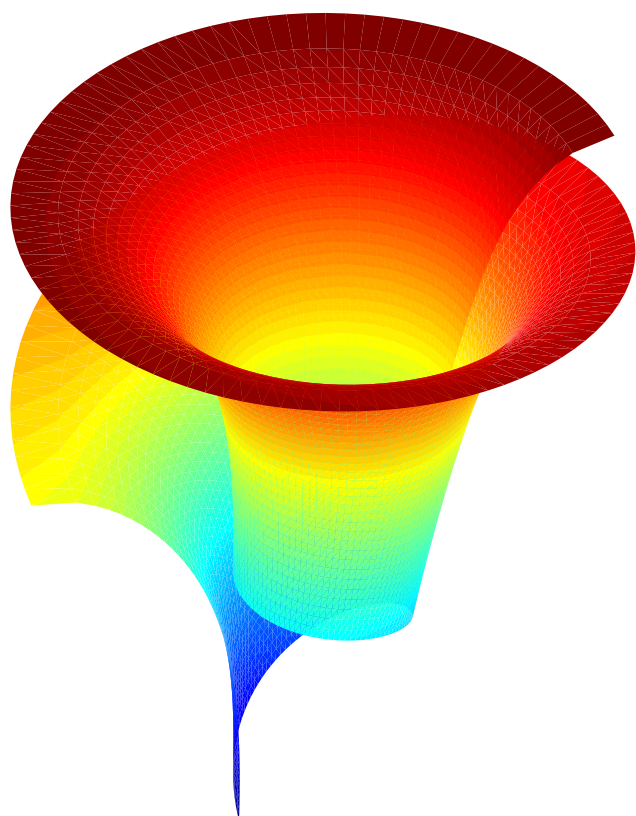

Supplement: Supplementary file 4 [file 9783110741780_Beispiele.zip]

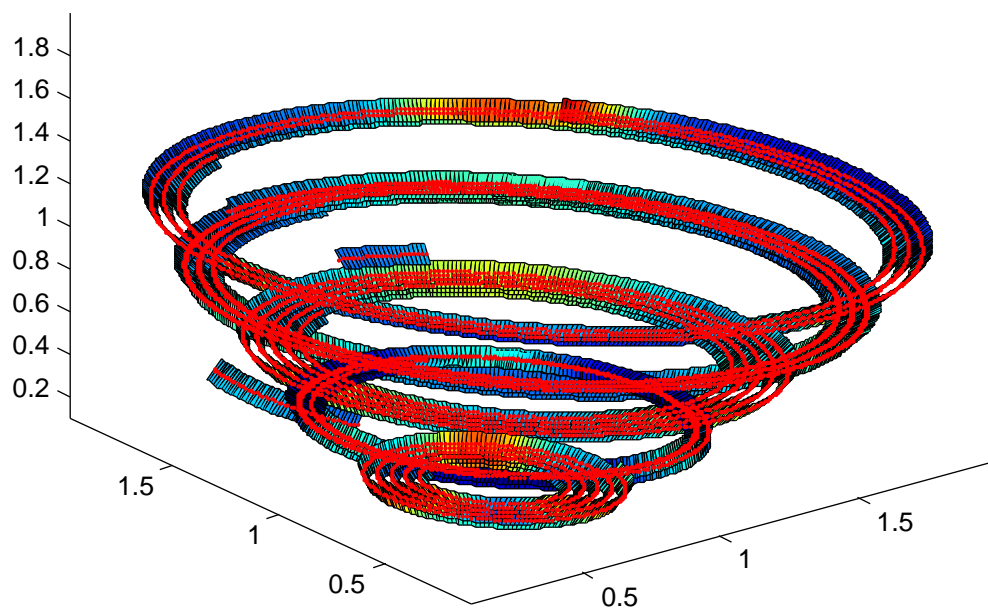

Supplement: Supplementary file 5 [file 9783110741780_Beispiele.zip]

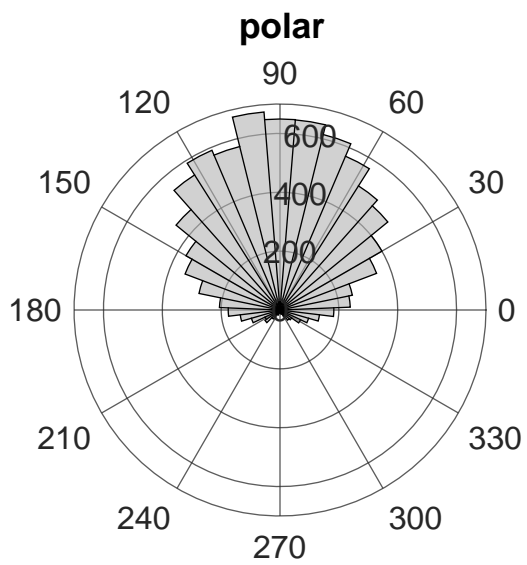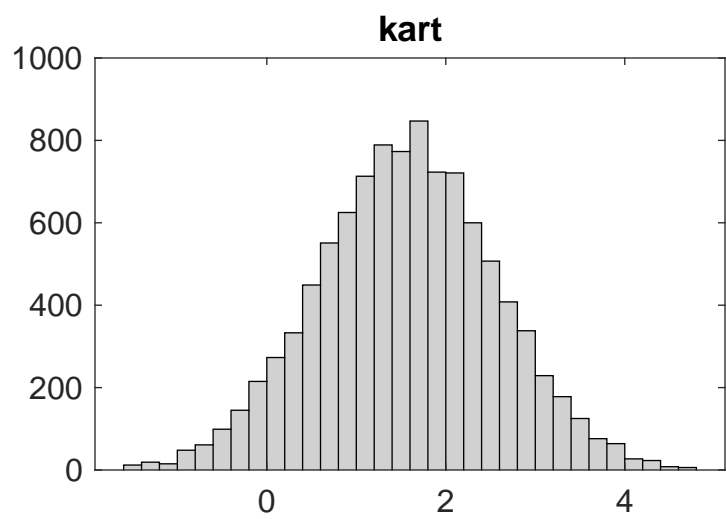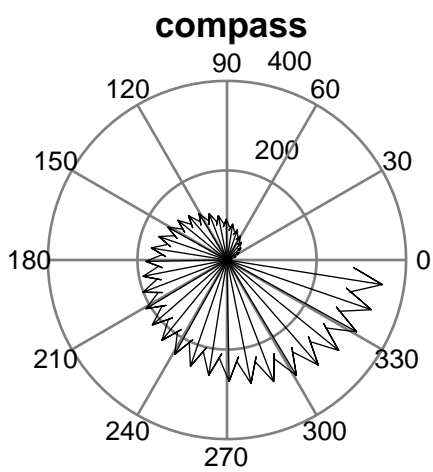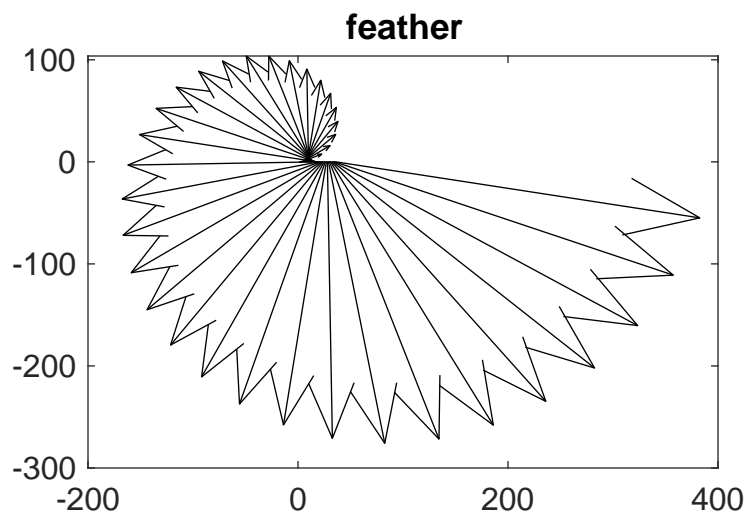

Supplement: Supplementary file 6 [file 9783110741780_Beispiele.zip]

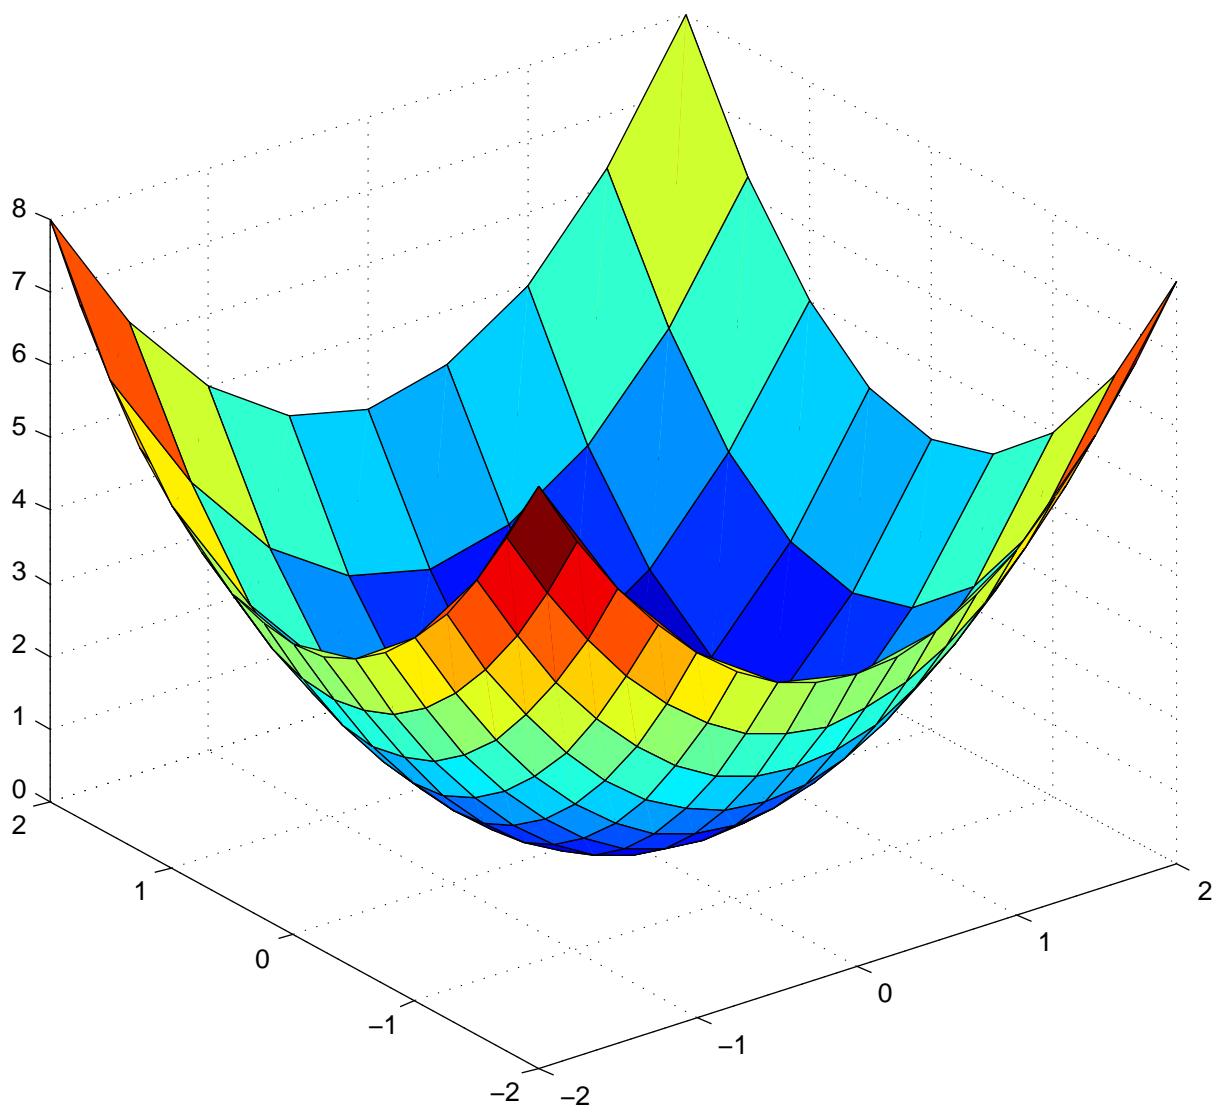

Supplement: Supplementary file 7 [file 9783110741780_Beispiele.zip]

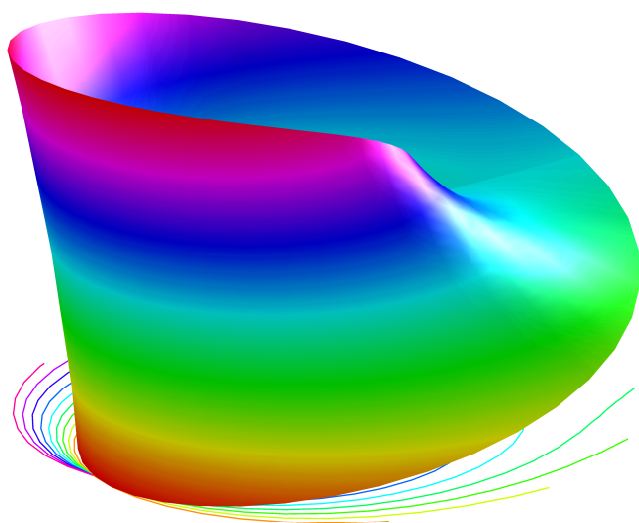

Supplement: Supplementary file 8 [file 9783110741780_Beispiele.zip]

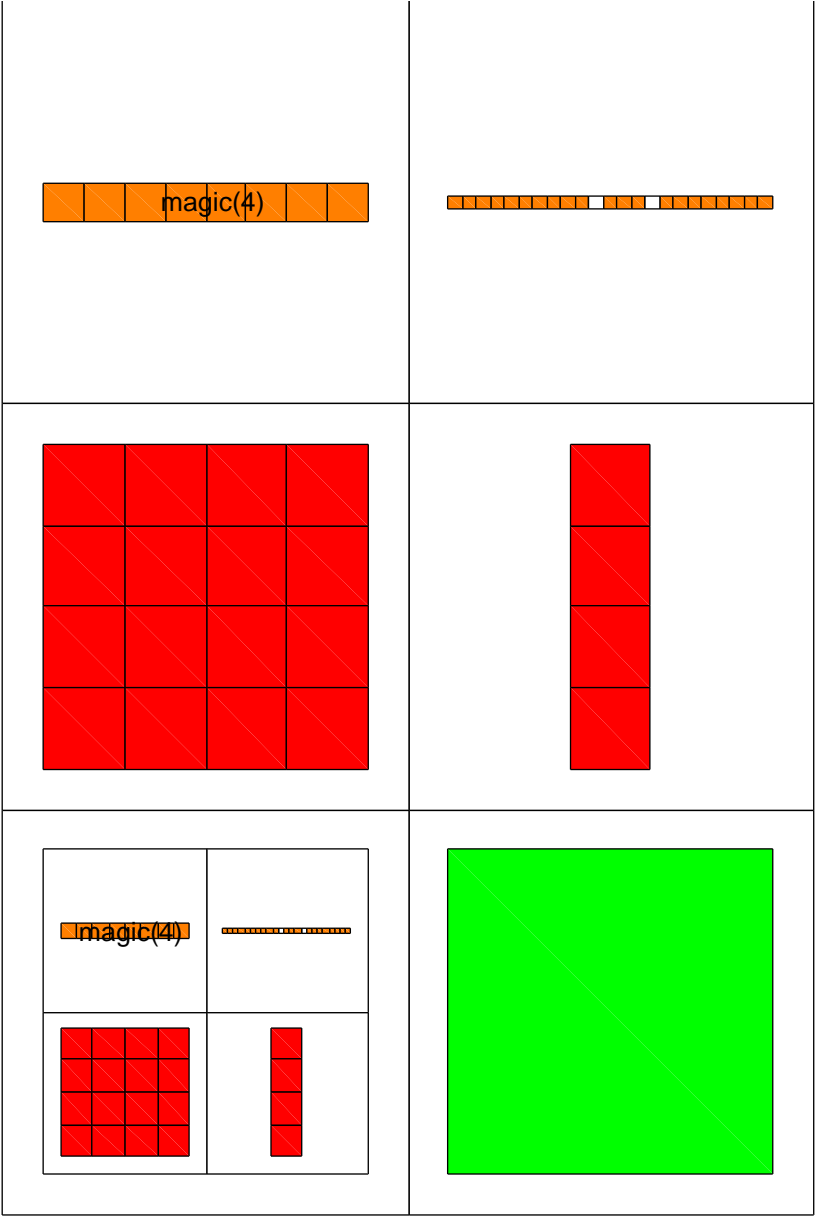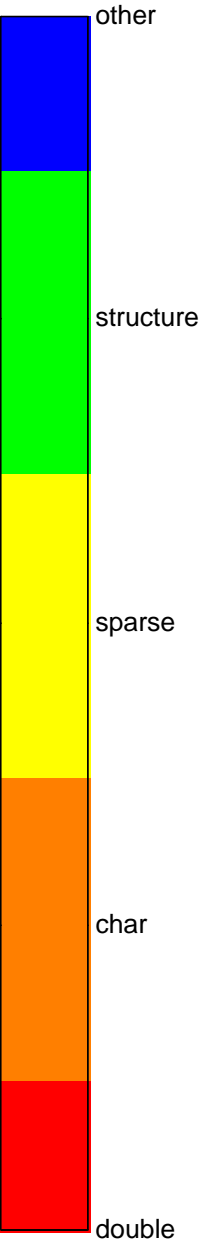

Supplement: Supplementary file 9 [file 9783110741780_Beispiele.zip]

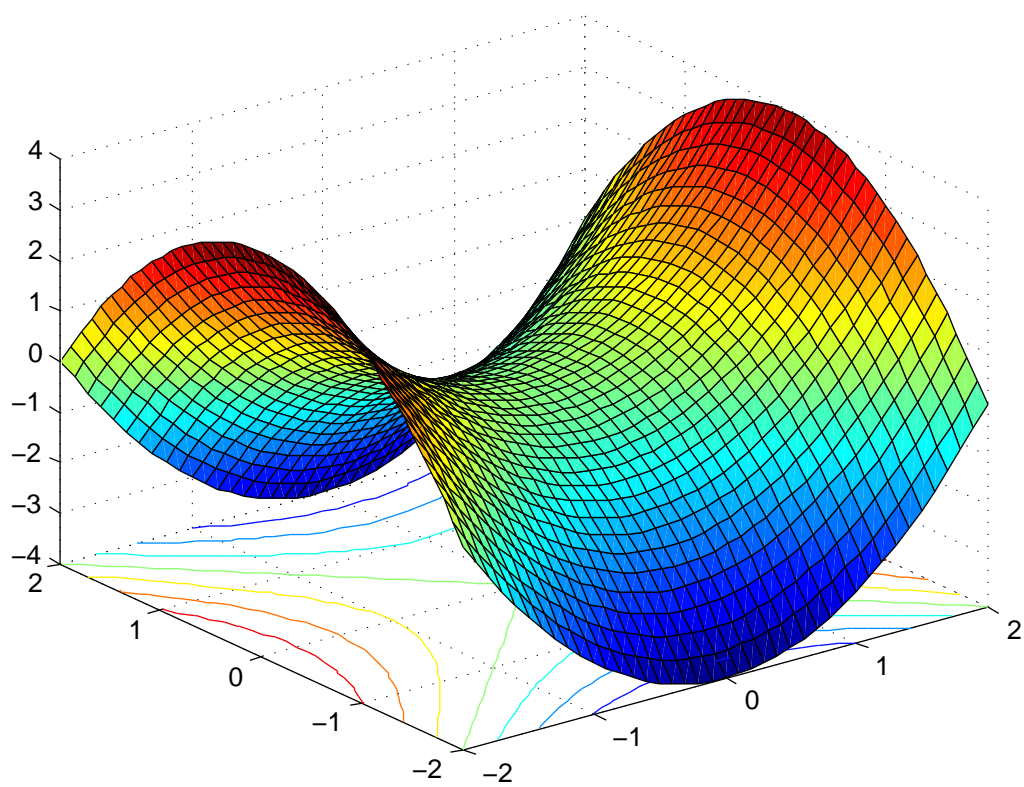

Supplement: Supplementary file 11 [file 9783110741780_Beispiele.zip]

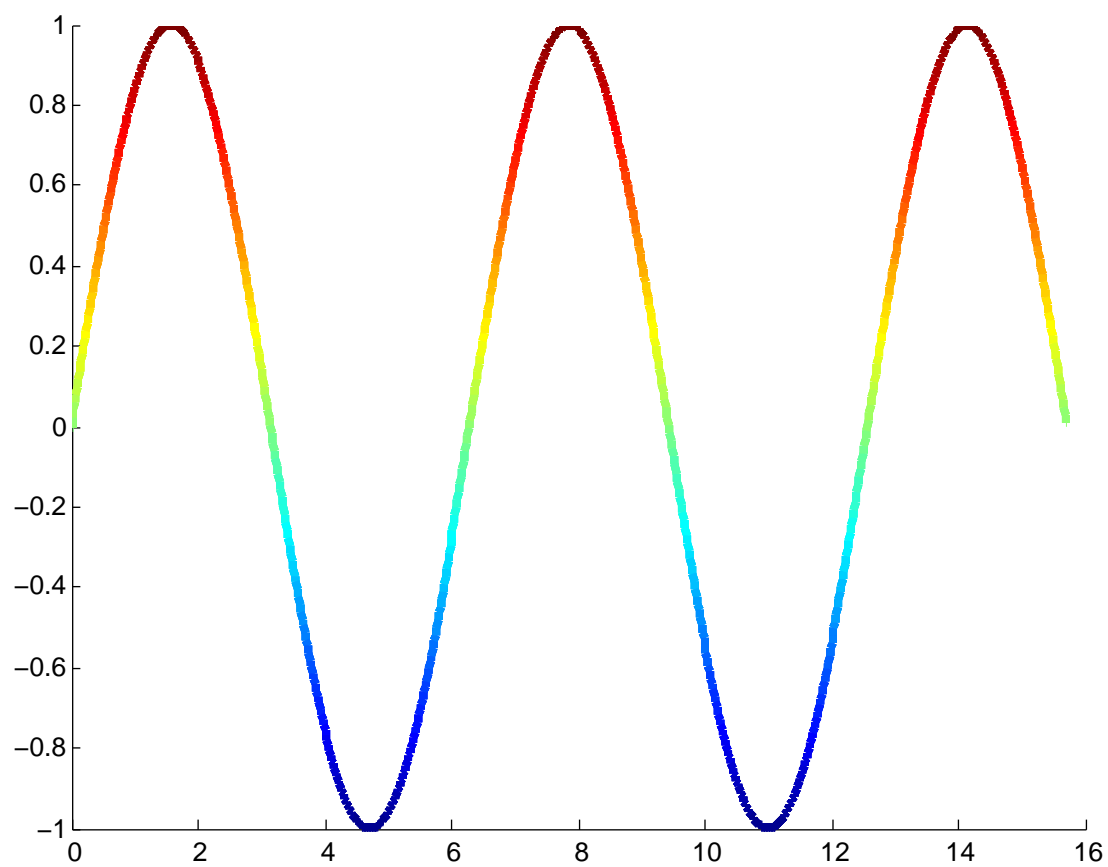

Supplement: Supplementary file 12 [file 9783110741780_Beispiele.zip]

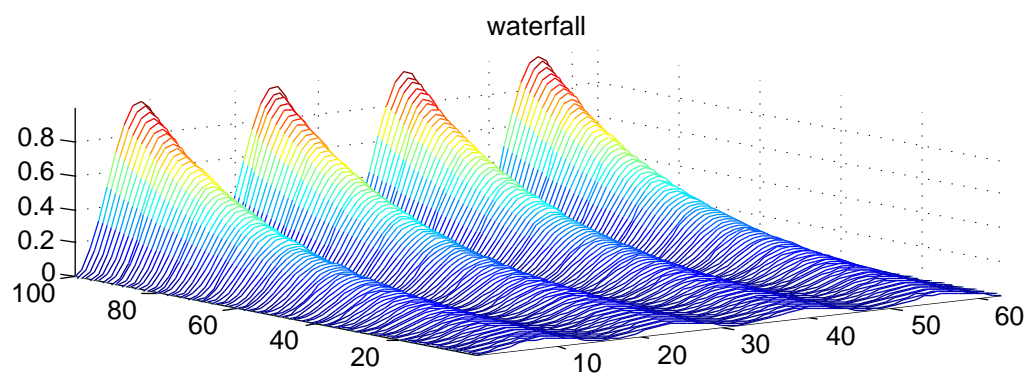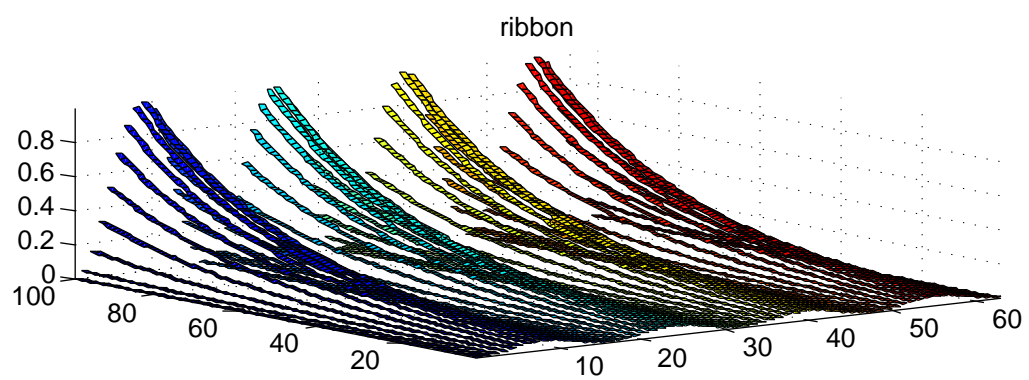

Supplement: Supplementary file 13 [file 9783110741780_Beispiele.zip]

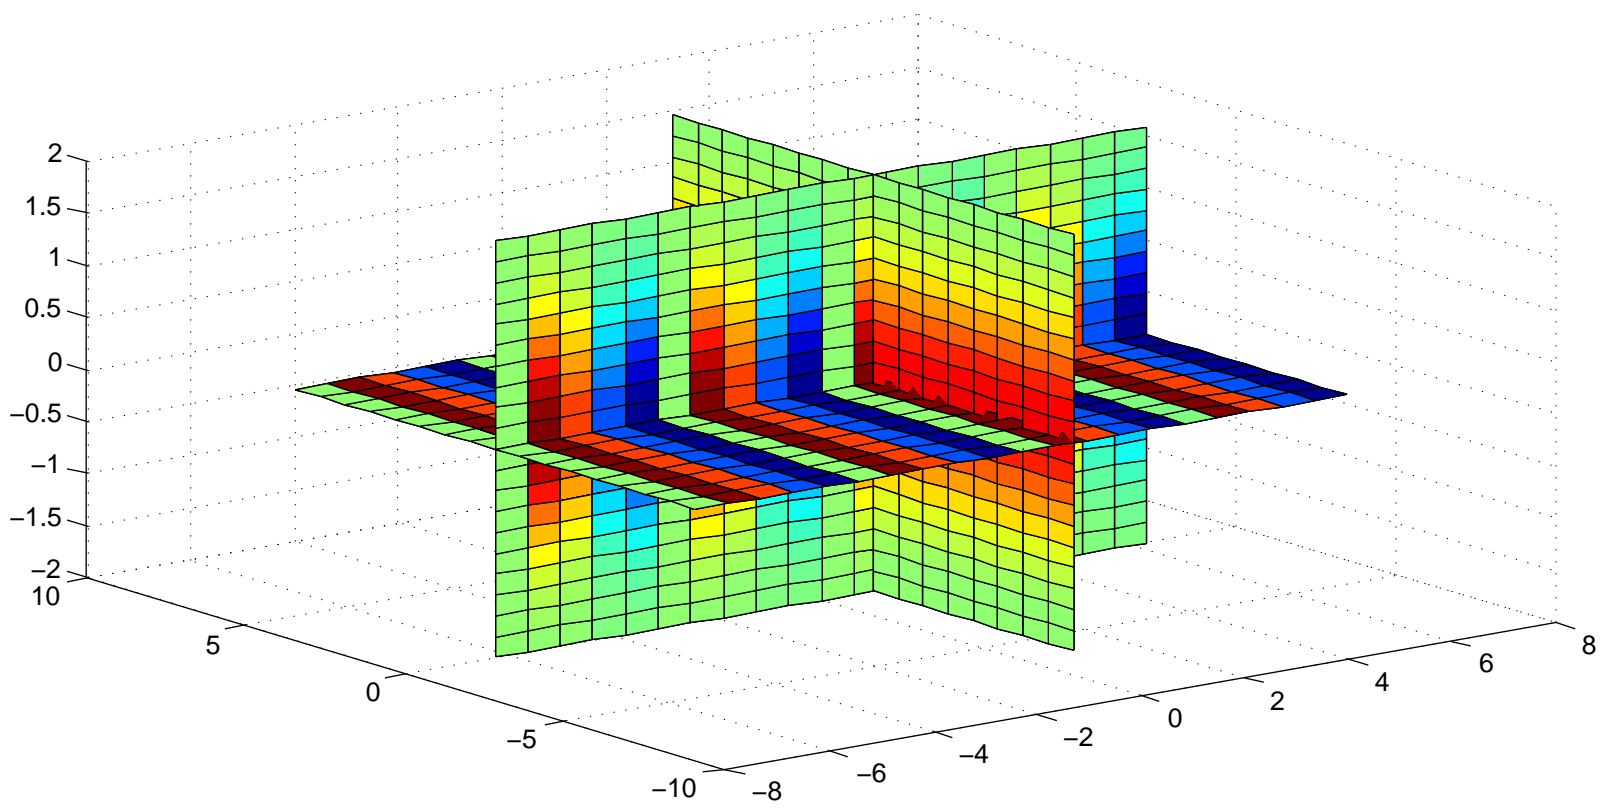

Supplement: Supplementary file 14 [file 9783110741780_Beispiele.zip]

Original

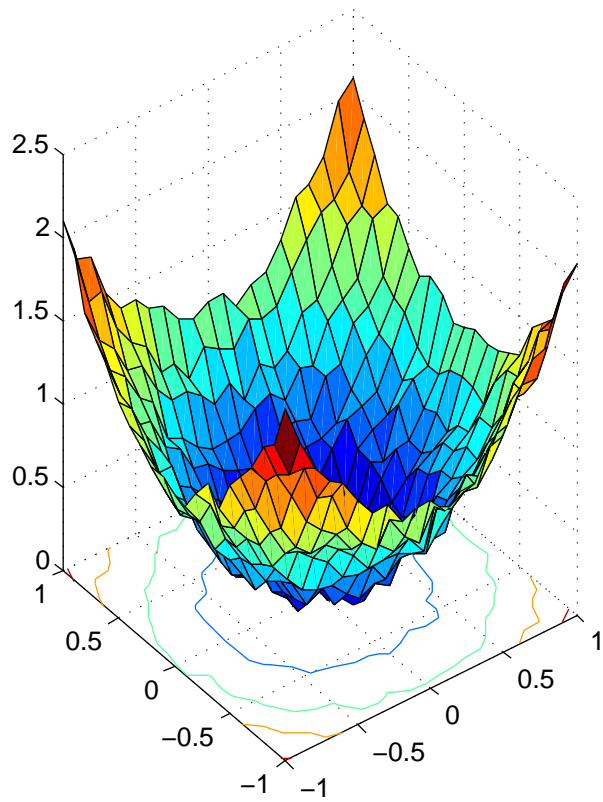

Glaettung

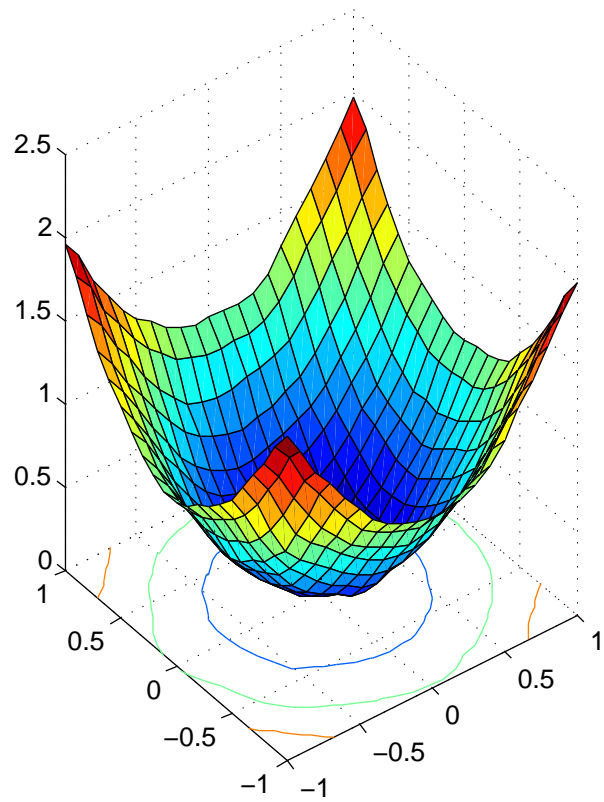

Supplement: Supplementary file 15 [file 9783110741780_Beispiele.zip]

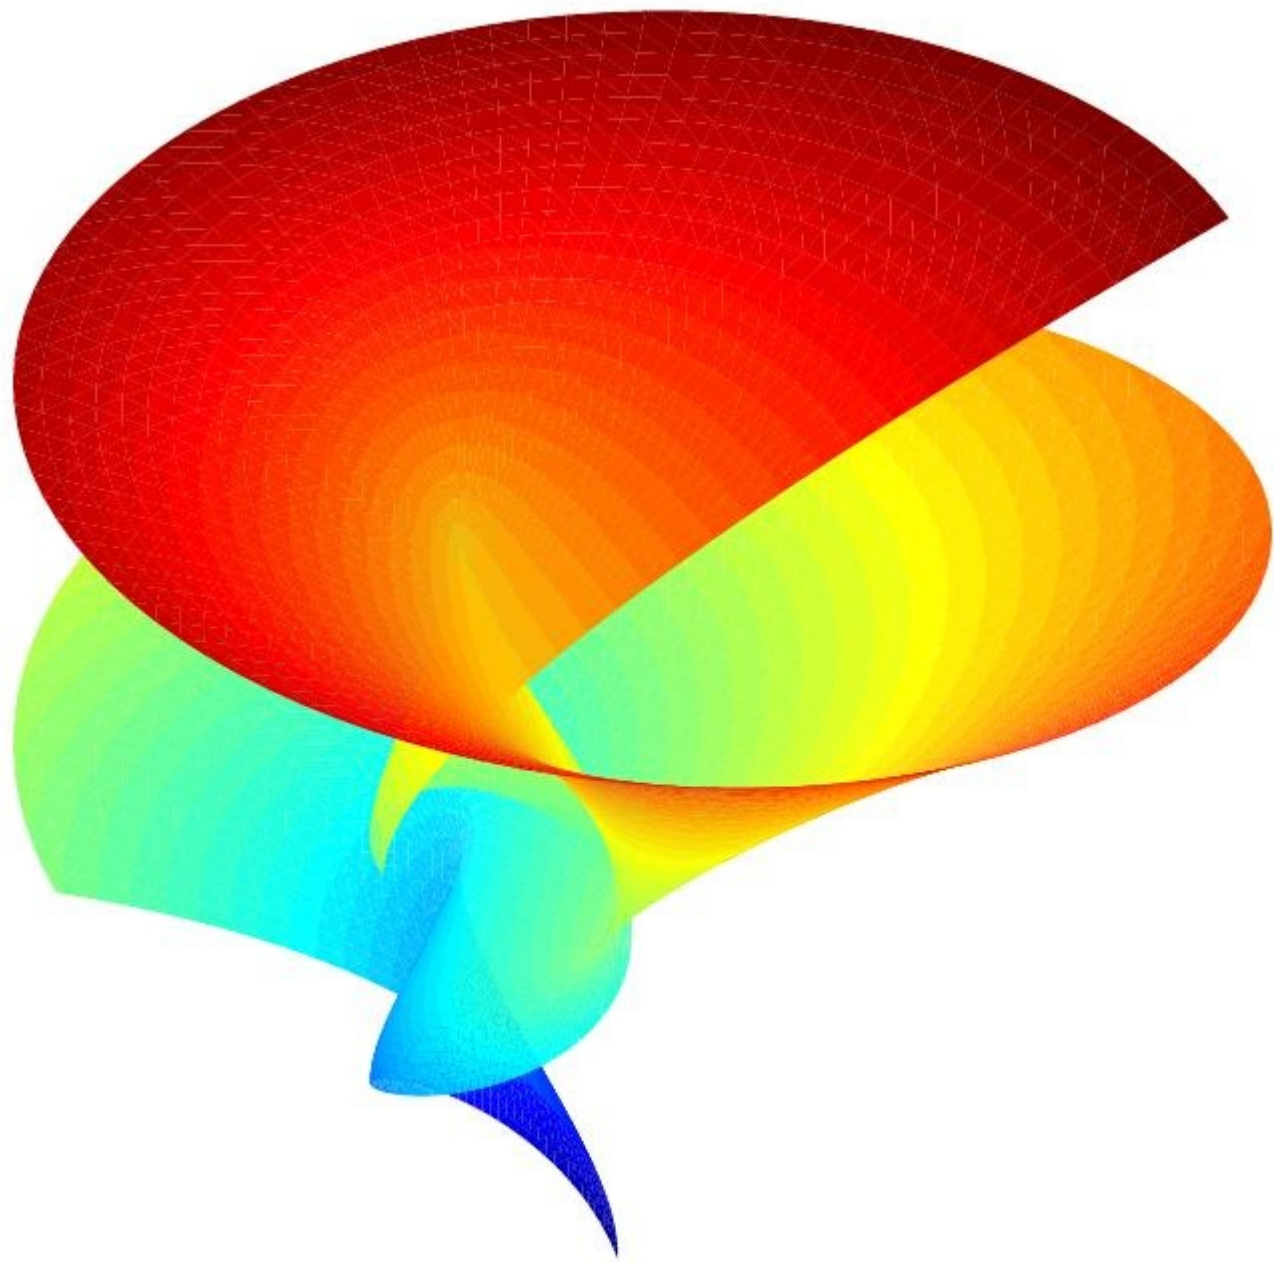

Supplement: Supplementary file 16 [file 9783110741780_Beispiele.zip]

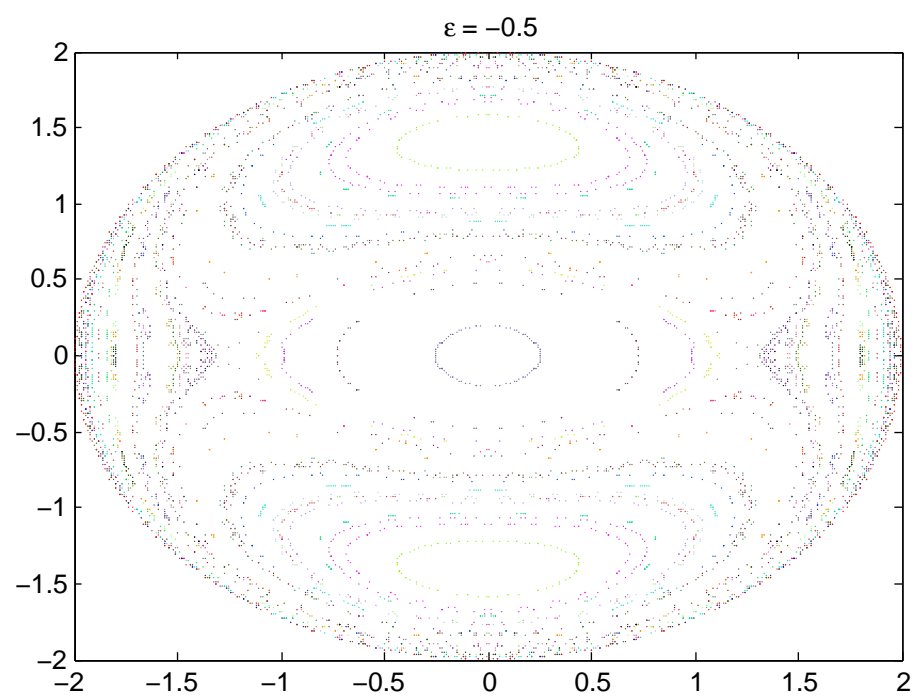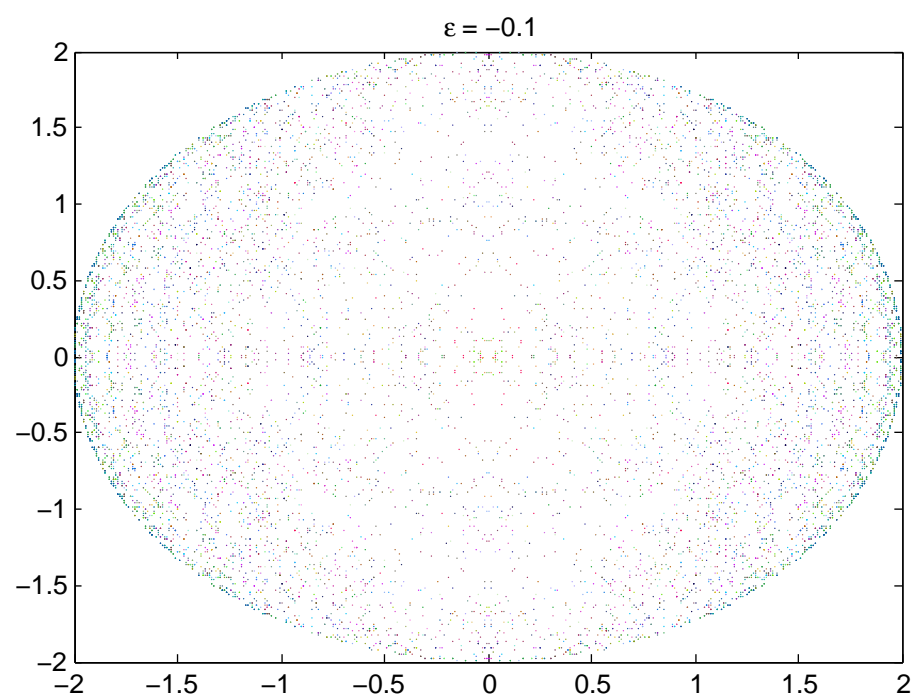

Supplement: Supplementary file 17 [file 9783110741780_Beispiele.zip]

Schnittflaeche

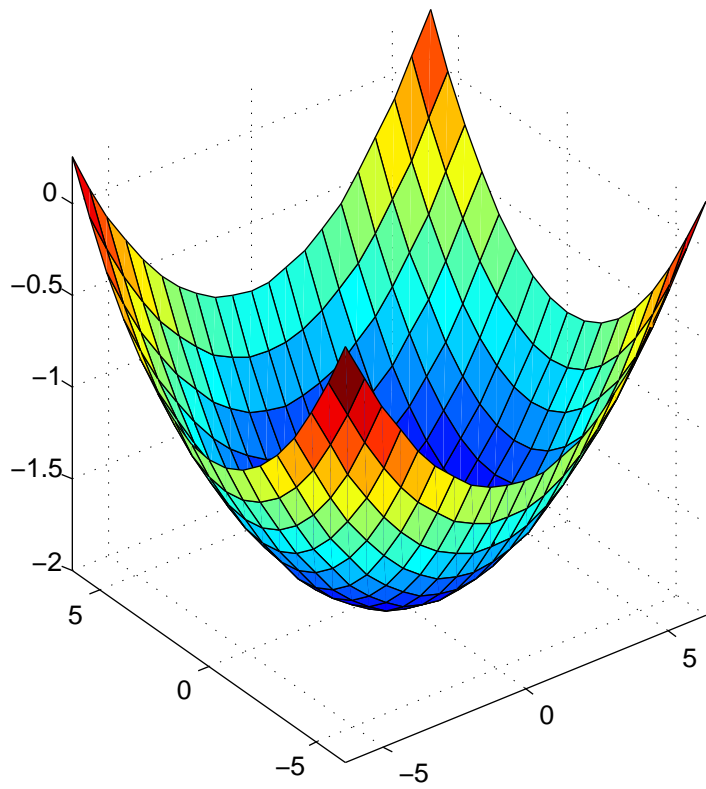

Slice

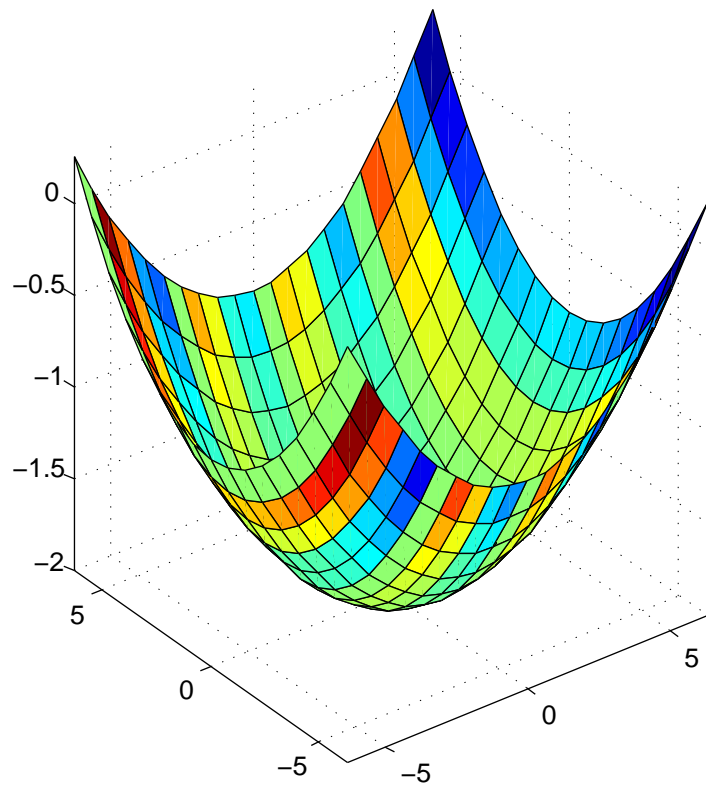

Supplement: Supplementary file 18 [file 9783110741780_Beispiele.zip]

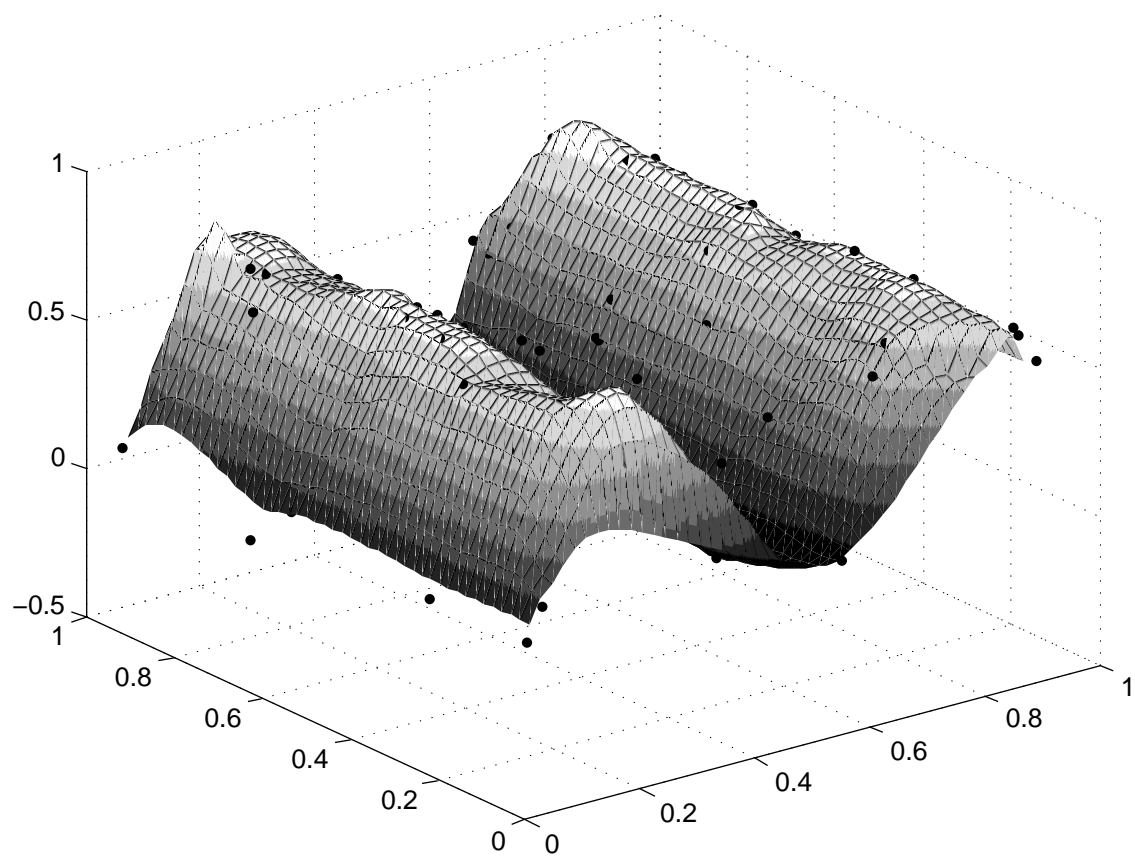

Supplement: Supplementary file 19 [file 9783110741780_Beispiele.zip]

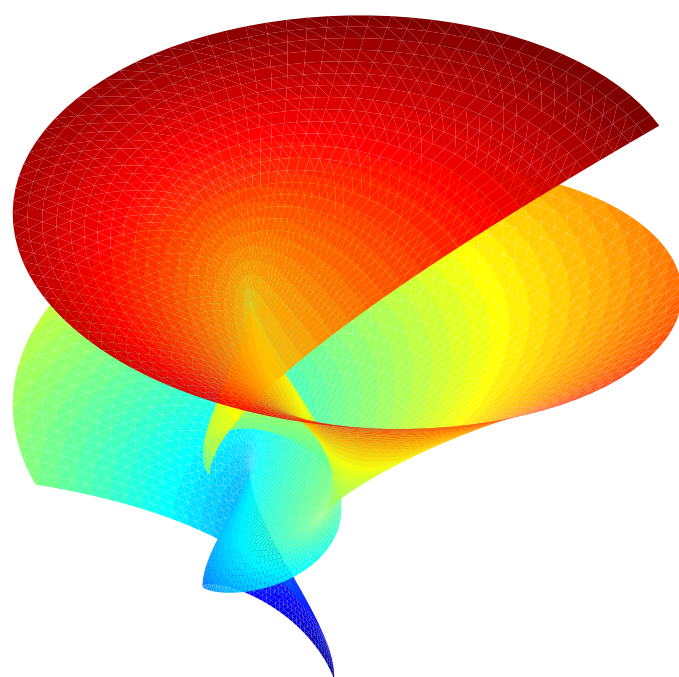

Supplement: Supplementary file 20 [file 9783110741780_Beispiele.zip]

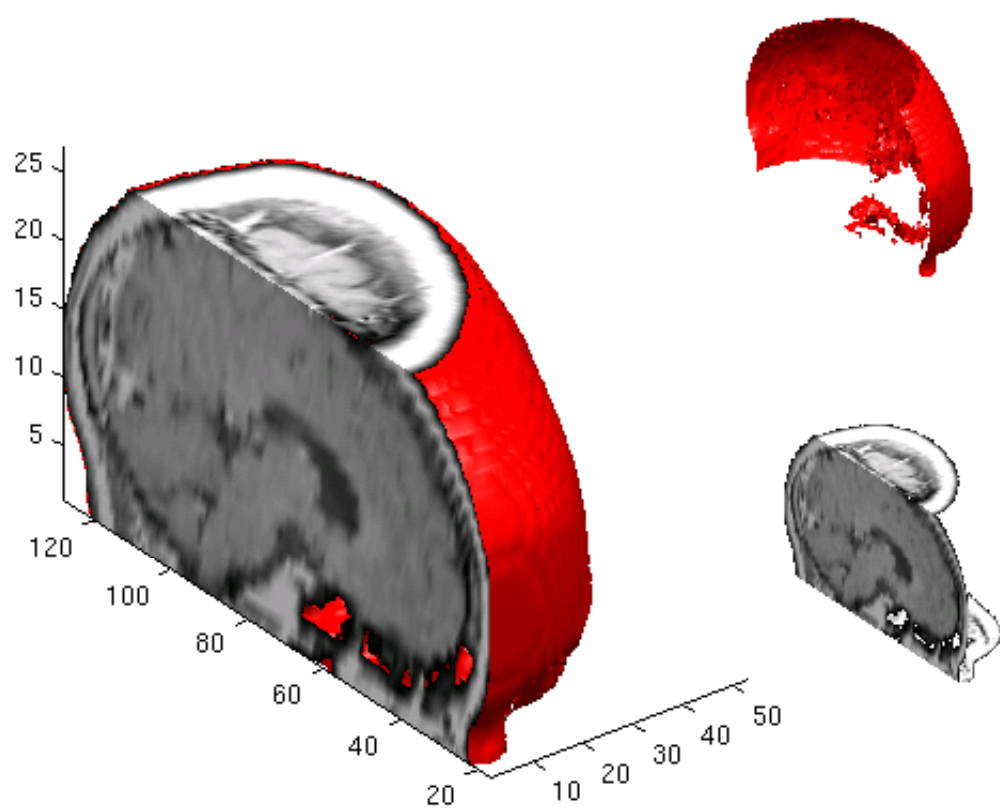

Supplement: Supplementary file 21 [file 9783110741780_Beispiele.zip]
